# Supplementary material for: Global optimization of small bimetallic Pd–Co binary nanoalloy clusters: a genetic algorithm approach at the DFT level
Source: Royal Society of Chemistry journal article supplement (doi:10.1039/c6cp00342g), 2016-01-01
Supplement: c6cp00342g1.zip [file c6cp00342g1.zip]

## Sheet: frequency
Global Optimization of Small Bimetallic Pd-Co Binary Nanoalloy Clusters: A Genetic Algorithm Approach at the DFT Level
Mikail Aslan, Jack B. A Davis and Roy L. Johnston
Vibrational Frequencies and Projected Infra Red Intensities of Small Bimetallic Pd-Co Binary Clusters
Pd0Co3		Pd0Co7
Normal Eigenvalue || Projected Infra Red Intensities		Normal Eigenvalue || Projected Infra Red Intensities
Mode [cm**-1] || [atomic units] [(debye/angs)**2] [(KM/mol)] [arbitrary]		Mode [cm**-1] || [atomic units] [(debye/angs)**2] [(KM/mol)] [arbitrary]
------ ---------- || -------------- ----------------- ---------- -----------		------ ---------- || -------------- ----------------- ---------- -----------
1 -0.000 || 0.000006 0.000 0.006 0.067		1 -0.000 || 0.000026 0.001 0.025 0.645
2 -0.000 || 0.000020 0.000 0.020 0.240		2 -0.000 || 0.000045 0.001 0.044 1.133
3 -0.000 || 0.000004 0.000 0.004 0.048		3 -0.000 || 0.000004 0.000 0.004 0.097
4 0.000 || 0.000010 0.000 0.010 0.123		4 0.000 || 0.000073 0.002 0.071 1.844
5 0.000 || 0.000049 0.001 0.047 0.572		5 0.000 || 0.000139 0.003 0.136 3.508
6 0.000 || 0.000001 0.000 0.001 0.015		6 0.000 || 0.000062 0.001 0.060 1.555
7 96.490 || 0.000428 0.010 0.417 5.028		7 66.234 || 0.000089 0.002 0.087 2.250
8 230.513 || 0.005695 0.131 5.552 66.981		8 103.381 || 0.000087 0.002 0.085 2.206
9 319.181 || 0.001439 0.033 1.403 16.925		9 107.999 || 0.000081 0.002 0.079 2.041
----------------------------------------------------------------------------		10 126.523 || 0.000384 0.009 0.374 9.681
Pd1Co2		11 131.803 || 0.000199 0.005 0.194 5.019
Normal Eigenvalue || Projected Infra Red Intensities		12 138.187 || 0.000236 0.005 0.231 5.967
Mode [cm**-1] || [atomic units] [(debye/angs)**2] [(KM/mol)] [arbitrary]		13 156.324 || 0.000075 0.002 0.073 1.895
------ ---------- || -------------- ----------------- ---------- -----------		14 175.534 || 0.000143 0.003 0.140 3.618
1 -0.000 || 0.000036 0.001 0.035 0.947		15 183.892 || 0.000242 0.006 0.236 6.114
2 -0.000 || 0.000005 0.000 0.005 0.126		16 210.322 || 0.000168 0.004 0.164 4.234
3 0.000 || 0.000101 0.002 0.099 2.687		17 224.159 || 0.000471 0.011 0.460 11.897
4 0.000 || 0.000070 0.002 0.068 1.855		18 252.646 || 0.001497 0.035 1.460 37.789
5 0.000 || 0.000046 0.001 0.045 1.214		19 253.502 || 0.001583 0.037 1.543 39.940
6 0.000 || 0.000076 0.002 0.074 2.014		20 288.407 || 0.001443 0.033 1.407 36.422
7 170.379 || 0.001825 0.042 1.779 48.519		21 303.827 || 0.001274 0.029 1.242 32.145
8 196.102 || 0.000382 0.009 0.373 10.159		Pd1Co6
9 296.494 || 0.000846 0.020 0.824 22.478		Normal Eigenvalue || Projected Infra Red Intensities
----------------------------------------------------------------------------		Mode [cm**-1] || [atomic units] [(debye/angs)**2] [(KM/mol)] [arbitrary]
Pd2Co1		------ ---------- || -------------- ----------------- ---------- -----------
Normal Eigenvalue || Projected Infra Red Intensities		1 -0.000 || 0.000025 0.001 0.024 0.923
Mode [cm**-1] || [atomic units] [(debye/angs)**2] [(KM/mol)] [arbitrary]		2 0.000 || 0.000007 0.000 0.007 0.250
------ ---------- || -------------- ----------------- ---------- -----------		3 0.000 || 0.000020 0.000 0.020 0.754
1 -0.000 || 0.000021 0.000 0.020 1.159		4 0.000 || 0.000010 0.000 0.009 0.359
2 -0.000 || 0.000025 0.001 0.024 1.400		5 0.000 || 0.000010 0.000 0.010 0.373
3 -0.000 || 0.000006 0.000 0.006 0.315		6 0.000 || 0.000015 0.000 0.015 0.561
4 -0.000 || 0.000008 0.000 0.007 0.421		7 59.788 || 0.000005 0.000 0.005 0.203
5 0.000 || 0.000004 0.000 0.004 0.200		8 78.652 || 0.000026 0.001 0.025 0.948
6 0.000 || 0.000034 0.001 0.033 1.881		9 90.172 || 0.000072 0.002 0.070 2.666
7 147.533 || 0.001111 0.026 1.083 61.897		10 95.654 || 0.000072 0.002 0.070 2.677
8 202.209 || 0.000006 0.000 0.006 0.342		11 102.352 || 0.000047 0.001 0.046 1.760
9 286.460 || 0.000402 0.009 0.392 22.385		12 148.846 || 0.000012 0.000 0.012 0.463
----------------------------------------------------------------------------		13 162.285 || 0.000047 0.001 0.046 1.747
Pd3Co0		14 163.103 || 0.000043 0.001 0.042 1.611
Normal Eigenvalue || Projected Infra Red Intensities		15 204.938 || 0.000194 0.004 0.189 7.174
Mode [cm**-1] || [atomic units] [(debye/angs)**2] [(KM/mol)] [arbitrary]		16 206.802 || 0.000126 0.003 0.123 4.679
------ ---------- || -------------- ----------------- ---------- -----------		17 234.173 || 0.001079 0.025 1.051 39.971
1 -0.000 || 0.000002 0.000 0.002 0.114		18 254.180 || 0.001289 0.030 1.257 47.774
2 -0.000 || 0.000000 0.000 0.000 0.001		19 254.489 || 0.001373 0.032 1.339 50.886
3 -0.000 || 0.000002 0.000 0.002 0.135		20 288.996 || 0.000469 0.011 0.457 17.390
4 -0.000 || 0.000001 0.000 0.001 0.083		21 294.732 || 0.000724 0.017 0.706 26.832
5 0.000 || 0.000006 0.000 0.006 0.446		Pd2Co5
6 0.000 || 0.000002 0.000 0.002 0.128		Normal Eigenvalue || Projected Infra Red Intensities
7 158.754 || 0.000439 0.010 0.428 30.475		Mode [cm**-1] || [atomic units] [(debye/angs)**2] [(KM/mol)] [arbitrary]
8 166.223 || 0.000832 0.019 0.811 57.848		------ ---------- || -------------- ----------------- ---------- -----------
9 236.868 || 0.000011 0.000 0.011 0.768		1 -0.000 || 0.000010 0.000 0.010 0.487
----------------------------------------------------------------------------		2 -0.000 || 0.000005 0.000 0.005 0.254
Pd0Co4		3 -0.000 || 0.000004 0.000 0.003 0.167
Normal Eigenvalue || Projected Infra Red Intensities		4 -0.000 || 0.000001 0.000 0.001 0.047
Mode [cm**-1] || [atomic units] [(debye/angs)**2] [(KM/mol)] [arbitrary]		5 -0.000 || 0.000007 0.000 0.007 0.356
------ ---------- || -------------- ----------------- ---------- -----------		6 0.000 || 0.000004 0.000 0.004 0.178
1 -0.000 || 0.000000 0.000 0.000 0.024		7 84.774 || 0.000103 0.002 0.100 4.898
2 -0.000 || 0.000000 0.000 0.000 0.010		8 92.205 || 0.000003 0.000 0.003 0.165
3 0.000 || 0.000000 0.000 0.000 0.004		9 99.888 || 0.000290 0.007 0.283 13.828
4 0.000 || 0.000000 0.000 0.000 0.023		10 138.558 || 0.000052 0.001 0.051 2.472
5 0.000 || 0.000000 0.000 0.000 0.038		11 144.740 || 0.000021 0.000 0.020 0.981
6 0.000 || 0.000000 0.000 0.000 0.016		12 148.019 || 0.000064 0.001 0.063 3.068
7 65.816 || 0.000001 0.000 0.001 0.081		13 153.070 || 0.000158 0.004 0.154 7.541
8 90.203 || 0.000004 0.000 0.004 0.517		14 160.326 || 0.000069 0.002 0.067 3.270
9 232.511 || 0.000002 0.000 0.002 0.232		15 201.582 || 0.000324 0.007 0.316 15.458
10 232.773 || 0.000477 0.011 0.465 57.393		16 202.392 || 0.000484 0.011 0.472 23.096
11 232.845 || 0.000502 0.012 0.489 60.327		17 234.840 || 0.000469 0.011 0.457 22.363
12 267.155 || 0.000011 0.000 0.011 1.336		18 244.510 || 0.000367 0.008 0.358 17.525
----------------------------------------------------------------------------		19 248.448 || 0.001291 0.030 1.258 61.568
Pd1Co3		20 286.161 || 0.000228 0.005 0.222 10.874
Normal Eigenvalue || Projected Infra Red Intensities		21 298.950 || 0.000449 0.010 0.437 21.401
Mode [cm**-1] || [atomic units] [(debye/angs)**2] [(KM/mol)] [arbitrary]		Pd3Co4
------ ---------- || -------------- ----------------- ---------- -----------		Normal Eigenvalue || Projected Infra Red Intensities
1 -0.000 || 0.000016 0.000 0.016 0.286		Mode [cm**-1] || [atomic units] [(debye/angs)**2] [(KM/mol)] [arbitrary]
2 -0.000 || 0.000020 0.000 0.019 0.354		------ ---------- || -------------- ----------------- ---------- -----------
3 -0.000 || 0.000057 0.001 0.056 1.018		1 -0.000 || 0.000002 0.000 0.002 0.055
4 -0.000 || 0.000009 0.000 0.009 0.166		2 -0.000 || 0.000002 0.000 0.002 0.051
5 0.000 || 0.000090 0.002 0.088 1.594		3 -0.000 || 0.000003 0.000 0.003 0.095
6 0.000 || 0.000045 0.001 0.044 0.798		4 -0.000 || 0.000001 0.000 0.001 0.032
7 42.589 || 0.000113 0.003 0.110 1.999		5 -0.000 || 0.000004 0.000 0.004 0.117
8 112.091 || 0.004419 0.102 4.308 78.381		6 0.000 || 0.000005 0.000 0.005 0.136
9 154.964 || 0.000237 0.005 0.231 4.201		7 64.067 || 0.000075 0.002 0.073 2.082
10 178.451 || 0.000404 0.009 0.394 7.174		8 75.935 || 0.000001 0.000 0.001 0.033
11 272.213 || 0.001065 0.025 1.038 18.895		9 113.482 || 0.000121 0.003 0.118 3.340
12 296.231 || 0.000290 0.007 0.282 5.137		10 117.588 || 0.000204 0.005 0.199 5.645
----------------------------------------------------------------------------		11 131.845 || 0.000021 0.000 0.021 0.583
Pd2Co2		12 136.250 || 0.000579 0.013 0.565 16.023
Normal Eigenvalue || Projected Infra Red Intensities		13 150.889 || 0.003612 0.083 3.521 99.930
Mode [cm**-1] || [atomic units] [(debye/angs)**2] [(KM/mol)] [arbitrary]		14 167.612 || 0.000082 0.002 0.080 2.279
------ ---------- || -------------- ----------------- ---------- -----------		15 172.410 || 0.001650 0.038 1.608 45.644
1 -0.000 || 0.000197 0.005 0.193 3.105		16 174.782 || 0.000000 0.000 0.000 0.009
2 -0.000 || 0.000015 0.000 0.014 0.231		17 202.299 || 0.000216 0.005 0.210 5.973
3 -0.000 || 0.000124 0.003 0.120 1.942		18 205.941 || 0.000015 0.000 0.015 0.418
4 -0.000 || 0.000038 0.001 0.037 0.598		19 245.304 || 0.000269 0.006 0.262 7.447
5 -0.000 || 0.000026 0.001 0.025 0.406		20 256.182 || 0.000604 0.014 0.588 16.702
6 0.000 || 0.000034 0.001 0.033 0.534		21 277.709 || 0.000123 0.003 0.120 3.405
7 110.781 || 0.000659 0.015 0.642 10.352		----------------------------------------------------------------------------
8 118.749 || 0.000125 0.003 0.122 1.962		Pd4Co3
9 175.973 || 0.004073 0.094 3.970 64.030		Normal Eigenvalue || Projected Infra Red Intensities
10 187.204 || 0.000675 0.016 0.658 10.609		Mode [cm**-1] || [atomic units] [(debye/angs)**2] [(KM/mol)] [arbitrary]
11 187.838 || 0.000467 0.011 0.456 7.346		------ ---------- || -------------- ----------------- ---------- -----------
12 289.276 || 0.001201 0.028 1.171 18.885		1 -0.000 || 0.000036 0.001 0.035 1.546
----------------------------------------------------------------------------		2 -0.000 || 0.000011 0.000 0.011 0.465
Pd3Co1		3 -0.000 || 0.000019 0.000 0.018 0.808
Normal Eigenvalue || Projected Infra Red Intensities		4 -0.000 || 0.000013 0.000 0.012 0.551
Mode [cm**-1] || [atomic units] [(debye/angs)**2] [(KM/mol)] [arbitrary]		5 -0.000 || 0.000030 0.001 0.029 1.277
------ ---------- || -------------- ----------------- ---------- -----------		6 -0.000 || 0.000009 0.000 0.009 0.389
1 -0.000 || 0.000007 0.000 0.007 0.195		7 75.258 || 0.000328 0.008 0.320 14.134
2 -0.000 || 0.000014 0.000 0.014 0.376		8 78.083 || 0.000328 0.008 0.319 14.105
3 -0.000 || 0.000025 0.001 0.025 0.662		9 106.735 || 0.000150 0.003 0.146 6.469
4 0.000 || 0.000018 0.000 0.018 0.479		10 115.360 || 0.000010 0.000 0.010 0.421
5 0.000 || 0.000028 0.001 0.027 0.734		11 118.872 || 0.000147 0.003 0.143 6.321
6 0.000 || 0.000004 0.000 0.004 0.106		12 129.134 || 0.000044 0.001 0.043 1.885
7 95.397 || 0.000202 0.005 0.197 5.310		13 133.175 || 0.000418 0.010 0.407 17.995
8 144.731 || 0.000644 0.015 0.628 16.959		14 134.516 || 0.000567 0.013 0.552 24.407
9 156.490 || 0.001829 0.042 1.783 48.181		15 176.703 || 0.000045 0.001 0.044 1.951
10 190.942 || 0.000077 0.002 0.075 2.029		16 195.096 || 0.000104 0.002 0.101 4.476
11 201.720 || 0.000026 0.001 0.026 0.697		17 199.164 || 0.000230 0.005 0.224 9.904
12 284.643 || 0.001681 0.039 1.638 44.273		18 205.237 || 0.000143 0.003 0.140 6.180
----------------------------------------------------------------------------		19 214.463 || 0.000146 0.003 0.142 6.274
Pd4Co0		20 257.318 || 0.001181 0.027 1.151 50.859
Normal Eigenvalue || Projected Infra Red Intensities		21 282.580 || 0.000919 0.021 0.896 39.585
Mode [cm**-1] || [atomic units] [(debye/angs)**2] [(KM/mol)] [arbitrary]		----------------------------------------------------------------------------
------ ---------- || -------------- ----------------- ---------- -----------		Pd5Co2
1 -0.000 || 0.000002 0.000 0.002 0.275		Normal Eigenvalue || Projected Infra Red Intensities
2 -0.000 || 0.000001 0.000 0.001 0.065		Mode [cm**-1] || [atomic units] [(debye/angs)**2] [(KM/mol)] [arbitrary]
3 -0.000 || 0.000001 0.000 0.001 0.167		------ ---------- || -------------- ----------------- ---------- -----------
4 0.000 || 0.000001 0.000 0.001 0.157		1 -0.000 || 0.000685 0.016 0.667 4.577
5 0.000 || 0.000001 0.000 0.001 0.090		2 -0.000 || 0.000086 0.002 0.084 0.578
6 0.000 || 0.000003 0.000 0.003 0.346		3 -0.000 || 0.000645 0.015 0.629 4.310
7 110.944 || 0.000002 0.000 0.002 0.238		4 -0.000 || 0.000164 0.004 0.160 1.100
8 130.717 || 0.000001 0.000 0.001 0.061		5 0.000 || 0.000034 0.001 0.033 0.229
9 155.903 || 0.000289 0.007 0.282 34.281		6 0.000 || 0.000128 0.003 0.124 0.854
10 157.705 || 0.000254 0.006 0.248 30.187		7 60.181 || 0.001260 0.029 1.228 8.424
11 183.966 || 0.000456 0.011 0.444 54.112		8 70.940 || 0.001411 0.033 1.375 9.433
12 239.438 || 0.000000 0.000 0.000 0.021		9 90.440 || 0.002694 0.062 2.626 18.010
----------------------------------------------------------------------------		10 104.538 || 0.000722 0.017 0.704 4.825
Pd0Co5		11 112.068 || 0.002080 0.048 2.027 13.904
Normal Eigenvalue || Projected Infra Red Intensities		12 121.793 || 0.005523 0.127 5.384 36.923
Mode [cm**-1] || [atomic units] [(debye/angs)**2] [(KM/mol)] [arbitrary]		13 123.993 || 0.002309 0.053 2.251 15.439
------ ---------- || -------------- ----------------- ---------- -----------		14 130.512 || 0.000435 0.010 0.424 2.910
1 -0.000 || 0.000002 0.000 0.002 0.058		15 150.203 || 0.000222 0.005 0.216 1.482
2 -0.000 || 0.000001 0.000 0.000 0.012		16 183.104 || 0.000734 0.017 0.716 4.907
3 0.000 || 0.000013 0.000 0.013 0.315		17 185.858 || 0.003494 0.081 3.407 23.363
4 0.000 || 0.000011 0.000 0.010 0.258		18 194.242 || 0.000893 0.021 0.870 5.969
5 0.000 || 0.000008 0.000 0.007 0.182		19 209.835 || 0.002623 0.061 2.557 17.539
6 0.000 || 0.000024 0.001 0.023 0.565		20 252.750 || 0.004357 0.101 4.248 29.131
7 74.281 || 0.000121 0.003 0.118 2.899		21 272.084 || 0.000911 0.021 0.888 6.093
8 95.434 || 0.000794 0.018 0.774 19.062		----------------------------------------------------------------------------
9 113.236 || 0.000661 0.015 0.644 15.874		Pd6Co1
10 151.269 || 0.000211 0.005 0.206 5.069		Normal Eigenvalue || Projected Infra Red Intensities
11 186.535 || 0.000027 0.001 0.026 0.643		Mode [cm**-1] || [atomic units] [(debye/angs)**2] [(KM/mol)] [arbitrary]
12 190.824 || 0.002628 0.061 2.562 63.125		------ ---------- || -------------- ----------------- ---------- -----------
13 231.209 || 0.000703 0.016 0.685 16.875		1 -0.000 || 0.000010 0.000 0.010 0.453
14 275.662 || 0.000315 0.007 0.307 7.569		2 -0.000 || 0.000002 0.000 0.002 0.097
15 326.819 || 0.000728 0.017 0.710 17.493		3 -0.000 || 0.000001 0.000 0.001 0.065
----------------------------------------------------------------------------		4 0.000 || 0.000003 0.000 0.003 0.123
Pd1Co4		5 0.000 || 0.000001 0.000 0.001 0.038
Normal Eigenvalue || Projected Infra Red Intensities		6 0.000 || 0.000003 0.000 0.003 0.134
Mode [cm**-1] || [atomic units] [(debye/angs)**2] [(KM/mol)] [arbitrary]		7 29.035 || 0.000006 0.000 0.006 0.268
------ ---------- || -------------- ----------------- ---------- -----------		8 41.077 || 0.000002 0.000 0.002 0.101
1 -0.000 || 0.000131 0.003 0.127 1.387		9 61.515 || 0.000021 0.000 0.020 0.893
2 -0.000 || 0.000012 0.000 0.012 0.125		10 80.154 || 0.000007 0.000 0.007 0.321
3 -0.000 || 0.000007 0.000 0.007 0.078		11 99.600 || 0.000068 0.002 0.066 2.925
4 -0.000 || 0.000013 0.000 0.013 0.143		12 101.346 || 0.000058 0.001 0.056 2.489
5 0.000 || 0.000073 0.002 0.071 0.776		13 134.415 || 0.000084 0.002 0.082 3.629
6 0.000 || 0.000036 0.001 0.035 0.381		14 134.865 || 0.000121 0.003 0.118 5.234
7 114.667 || 0.001350 0.031 1.316 14.318		15 139.229 || 0.000139 0.003 0.135 5.995
8 116.483 || 0.001949 0.045 1.900 20.678		16 143.975 || 0.000678 0.016 0.661 29.308
9 155.648 || 0.000371 0.009 0.362 3.934		17 145.896 || 0.000576 0.013 0.561 24.896
10 157.135 || 0.000389 0.009 0.379 4.125		18 147.885 || 0.000073 0.002 0.072 3.176
11 163.489 || 0.000102 0.002 0.100 1.084		19 226.230 || 0.001750 0.040 1.706 75.663
12 183.530 || 0.002349 0.054 2.290 24.913		20 232.969 || 0.000175 0.004 0.170 7.558
13 192.299 || 0.006216 0.143 6.060 65.933		21 234.272 || 0.001079 0.025 1.052 46.635
14 271.471 || 0.001082 0.025 1.055 11.478		----------------------------------------------------------------------------
15 328.409 || 0.000061 0.001 0.060 0.648		Pd7Co0
----------------------------------------------------------------------------		Normal Eigenvalue || Projected Infra Red Intensities
Pd2Co3		Mode [cm**-1] || [atomic units] [(debye/angs)**2] [(KM/mol)] [arbitrary]
Normal Eigenvalue || Projected Infra Red Intensities		------ ---------- || -------------- ----------------- ---------- -----------
Mode [cm**-1] || [atomic units] [(debye/angs)**2] [(KM/mol)] [arbitrary]		1 -0.000 || 0.000190 0.004 0.185 1.105
------ ---------- || -------------- ----------------- ---------- -----------		2 -0.000 || 0.000064 0.001 0.062 0.371
1 -0.000 || 0.000307 0.007 0.299 4.062		3 -0.000 || 0.000061 0.001 0.059 0.353
2 -0.000 || 0.000017 0.000 0.017 0.229		4 -0.000 || 0.000056 0.001 0.054 0.325
3 -0.000 || 0.000013 0.000 0.013 0.173		5 0.000 || 0.000017 0.000 0.016 0.098
4 -0.000 || 0.000009 0.000 0.009 0.118		6 0.000 || 0.000083 0.002 0.081 0.481
5 -0.000 || 0.000002 0.000 0.002 0.024		7 56.313 || 0.000087 0.002 0.085 0.508
6 -0.000 || 0.000050 0.001 0.049 0.668		8 59.012 || 0.000435 0.010 0.424 2.531
7 82.280 || 0.000688 0.016 0.671 9.103		9 60.501 || 0.000207 0.005 0.201 1.203
8 107.268 || 0.001471 0.034 1.434 19.447		10 96.392 || 0.000449 0.010 0.438 2.614
9 140.085 || 0.000109 0.003 0.107 1.446		11 99.187 || 0.000481 0.011 0.469 2.797
10 158.069 || 0.000094 0.002 0.092 1.246		12 100.367 || 0.000329 0.008 0.321 1.915
11 171.075 || 0.000781 0.018 0.762 10.329		13 103.433 || 0.001062 0.024 1.035 6.179
12 180.703 || 0.002480 0.057 2.417 32.788		14 107.135 || 0.000382 0.009 0.373 2.225
13 209.605 || 0.002166 0.050 2.111 28.640		15 118.164 || 0.001319 0.030 1.286 7.676
14 255.789 || 0.002950 0.068 2.876 39.007		16 126.451 || 0.000136 0.003 0.133 0.792
15 303.345 || 0.000206 0.005 0.201 2.721		17 128.465 || 0.000585 0.013 0.570 3.405
----------------------------------------------------------------------------		18 131.831 || 0.000168 0.004 0.164 0.978
Pd3Co2		19 162.599 || 0.026295 0.607 25.633 153.029
Normal Eigenvalue || Projected Infra Red Intensities		20 193.825 || 0.003056 0.071 2.980 17.788
Mode [cm**-1] || [atomic units] [(debye/angs)**2] [(KM/mol)] [arbitrary]		21 207.389 || 0.000623 0.014 0.608 3.628
------ ---------- || -------------- ----------------- ---------- -----------		----------------------------------------------------------------------------
1 -0.000 || 0.000008 0.000 0.008 0.161
2 -0.000 || 0.000069 0.002 0.067 1.424
3 -0.000 || 0.000005 0.000 0.005 0.100
4 -0.000 || 0.000037 0.001 0.036 0.759
5 -0.000 || 0.000032 0.001 0.031 0.664
6 0.000 || 0.000019 0.000 0.018 0.383
7 83.120 || 0.000335 0.008 0.326 6.895
8 101.528 || 0.000815 0.019 0.794 16.795
9 132.208 || 0.000047 0.001 0.046 0.977
10 141.016 || 0.000023 0.001 0.022 0.467
11 173.251 || 0.002816 0.065 2.745 58.040
12 182.304 || 0.000108 0.002 0.105 2.218
13 183.605 || 0.000023 0.001 0.023 0.481
14 244.748 || 0.002260 0.052 2.203 46.575
15 287.579 || 0.000682 0.016 0.665 14.060
----------------------------------------------------------------------------
Pd4Co1
Normal Eigenvalue || Projected Infra Red Intensities
Mode [cm**-1] || [atomic units] [(debye/angs)**2] [(KM/mol)] [arbitrary]
------ ---------- || -------------- ----------------- ---------- -----------
1 -0.000 || 0.000022 0.001 0.021 0.553
2 -0.000 || 0.000006 0.000 0.005 0.140
3 -0.000 || 0.000002 0.000 0.002 0.040
4 -0.000 || 0.000014 0.000 0.014 0.361
5 0.000 || 0.000015 0.000 0.015 0.381
6 0.000 || 0.000006 0.000 0.006 0.153
7 50.529 || 0.000008 0.000 0.008 0.195
8 94.715 || 0.000291 0.007 0.284 7.332
9 120.599 || 0.000073 0.002 0.071 1.841
10 133.944 || 0.000027 0.001 0.026 0.678
11 150.606 || 0.001175 0.027 1.146 29.584
12 153.765 || 0.001329 0.031 1.296 33.452
13 176.252 || 0.000050 0.001 0.049 1.267
14 238.349 || 0.002029 0.047 1.978 51.069
15 260.793 || 0.000912 0.021 0.889 22.953
----------------------------------------------------------------------------
Pd5Co0
Normal Eigenvalue || Projected Infra Red Intensities
Mode [cm**-1] || [atomic units] [(debye/angs)**2] [(KM/mol)] [arbitrary]
------ ---------- || -------------- ----------------- ---------- -----------
1 -0.000 || 0.000003 0.000 0.003 0.214
2 -0.000 || 0.000006 0.000 0.006 0.470
3 -0.000 || 0.000004 0.000 0.003 0.287
4 0.000 || 0.000006 0.000 0.006 0.517
5 0.000 || 0.000000 0.000 0.000 0.031
6 0.000 || 0.000001 0.000 0.001 0.083
7 53.434 || 0.000000 0.000 0.000 0.013
8 118.418 || 0.000000 0.000 0.000 0.016
9 130.274 || 0.000006 0.000 0.006 0.500
10 131.179 || 0.000007 0.000 0.006 0.528
11 142.754 || 0.000415 0.010 0.405 33.477
12 179.498 || 0.000000 0.000 0.000 0.037
13 195.541 || 0.000713 0.016 0.695 57.540
14 196.054 || 0.000663 0.015 0.647 53.513
15 221.320 || 0.000034 0.001 0.034 2.773
----------------------------------------------------------------------------
Pd0Co6
Normal Eigenvalue || Projected Infra Red Intensities
Mode [cm**-1] || [atomic units] [(debye/angs)**2] [(KM/mol)] [arbitrary]
------ ---------- || -------------- ----------------- ---------- -----------
1 -0.000 || 0.000000 0.000 0.000 0.001
2 -0.000 || 0.000000 0.000 0.000 0.001
3 -0.000 || 0.000000 0.000 0.000 0.001
4 0.000 || 0.000000 0.000 0.000 0.000
5 0.000 || 0.000001 0.000 0.001 0.011
6 0.000 || 0.000000 0.000 0.000 0.001
7 120.155 || 0.000002 0.000 0.002 0.025
8 120.203 || 0.000002 0.000 0.002 0.030
9 120.754 || 0.000001 0.000 0.001 0.010
10 186.123 || 0.000000 0.000 0.000 0.001
11 186.822 || 0.000000 0.000 0.000 0.001
12 224.275 || 0.000000 0.000 0.000 0.000
13 226.462 || 0.000000 0.000 0.000 0.001
14 226.571 || 0.000001 0.000 0.001 0.013
15 268.631 || 0.004984 0.115 4.859 60.646
16 268.649 || 0.004966 0.115 4.841 60.420
17 268.992 || 0.004836 0.112 4.714 58.837
18 343.743 || 0.000000 0.000 0.000 0.001
----------------------------------------------------------------------------
Pd1Co5
Normal Eigenvalue || Projected Infra Red Intensities
Mode [cm**-1] || [atomic units] [(debye/angs)**2] [(KM/mol)] [arbitrary]
------ ---------- || -------------- ----------------- ---------- -----------
1 -0.000 || 0.000001 0.000 0.001 0.038
2 -0.000 || 0.000002 0.000 0.002 0.069
3 -0.000 || 0.000056 0.001 0.055 1.840
4 -0.000 || 0.000008 0.000 0.008 0.267
5 -0.000 || 0.000032 0.001 0.031 1.057
6 0.000 || 0.000013 0.000 0.013 0.442
7 81.890 || 0.000191 0.004 0.186 6.268
8 82.947 || 0.000290 0.007 0.283 9.526
9 129.214 || 0.000020 0.000 0.020 0.663
10 151.616 || 0.000033 0.001 0.032 1.085
11 157.140 || 0.000153 0.004 0.150 5.037
12 177.799 || 0.000005 0.000 0.005 0.165
13 177.884 || 0.000017 0.000 0.017 0.569
14 239.990 || 0.000008 0.000 0.008 0.276
15 248.580 || 0.000518 0.012 0.505 16.995
16 260.527 || 0.002020 0.047 1.970 66.336
17 260.698 || 0.001814 0.042 1.769 59.574
18 318.217 || 0.000298 0.007 0.291 9.794
----------------------------------------------------------------------------
Pd2Co4
Normal Eigenvalue || Projected Infra Red Intensities
Mode [cm**-1] || [atomic units] [(debye/angs)**2] [(KM/mol)] [arbitrary]
------ ---------- || -------------- ----------------- ---------- -----------
1 -0.000 || 0.000000 0.000 0.000 0.010
2 -0.000 || 0.000001 0.000 0.001 0.032
3 -0.000 || 0.000001 0.000 0.001 0.015
4 -0.000 || 0.000000 0.000 0.000 0.013
5 0.000 || 0.000001 0.000 0.001 0.019
6 0.000 || 0.000002 0.000 0.002 0.044
7 78.312 || 0.000160 0.004 0.156 4.391
8 96.935 || 0.000021 0.000 0.021 0.577
9 108.998 || 0.000862 0.020 0.841 23.600
10 136.024 || 0.000394 0.009 0.384 10.794
11 153.973 || 0.001843 0.043 1.797 50.447
12 157.549 || 0.000225 0.005 0.220 6.171
13 162.682 || 0.000168 0.004 0.164 4.609
14 190.299 || 0.000001 0.000 0.001 0.034
15 212.180 || 0.000246 0.006 0.240 6.730
16 232.659 || 0.001339 0.031 1.305 36.651
17 281.149 || 0.001021 0.024 0.995 27.939
18 300.938 || 0.000290 0.007 0.282 7.925
----------------------------------------------------------------------------
Pd3Co3
Normal Eigenvalue || Projected Infra Red Intensities
Mode [cm**-1] || [atomic units] [(debye/angs)**2] [(KM/mol)] [arbitrary]
------ ---------- || -------------- ----------------- ---------- -----------
1 -0.000 || 0.000007 0.000 0.007 0.164
2 -0.000 || 0.000031 0.001 0.030 0.720
3 -0.000 || 0.000015 0.000 0.015 0.357
4 -0.000 || 0.000027 0.001 0.026 0.618
5 0.000 || 0.000011 0.000 0.011 0.256
6 0.000 || 0.000011 0.000 0.011 0.262
7 66.125 || 0.000219 0.005 0.213 5.091
8 76.293 || 0.000172 0.004 0.168 4.007
9 111.625 || 0.000925 0.021 0.902 21.522
10 118.289 || 0.000372 0.009 0.362 8.648
11 132.175 || 0.000917 0.021 0.894 21.338
12 146.311 || 0.000435 0.010 0.424 10.133
13 150.696 || 0.001798 0.041 1.753 41.848
14 181.540 || 0.000109 0.003 0.106 2.534
15 197.214 || 0.000627 0.014 0.612 14.602
16 214.915 || 0.000380 0.009 0.370 8.833
17 258.518 || 0.001500 0.035 1.463 34.919
18 287.521 || 0.000178 0.004 0.174 4.148
----------------------------------------------------------------------------
Pd4Co2
Normal Eigenvalue || Projected Infra Red Intensities
Mode [cm**-1] || [atomic units] [(debye/angs)**2] [(KM/mol)] [arbitrary]
------ ---------- || -------------- ----------------- ---------- -----------
1 -0.000 || 0.000003 0.000 0.003 0.090
2 -0.000 || 0.000014 0.000 0.013 0.401
3 -0.000 || 0.000003 0.000 0.003 0.084
4 -0.000 || 0.000002 0.000 0.002 0.064
5 0.000 || 0.000008 0.000 0.008 0.229
6 0.000 || 0.000001 0.000 0.001 0.038
7 53.613 || 0.000008 0.000 0.007 0.220
8 67.185 || 0.000061 0.001 0.059 1.786
9 111.323 || 0.000442 0.010 0.431 12.945
10 117.211 || 0.000716 0.017 0.698 20.950
11 125.129 || 0.000121 0.003 0.118 3.537
12 147.716 || 0.001447 0.033 1.411 42.341
13 162.566 || 0.001384 0.032 1.350 40.509
14 187.430 || 0.000024 0.001 0.023 0.704
15 190.390 || 0.000062 0.001 0.061 1.825
16 195.047 || 0.000038 0.001 0.037 1.113
17 257.070 || 0.001658 0.038 1.616 48.509
18 290.280 || 0.000159 0.004 0.155 4.655
----------------------------------------------------------------------------
Pd5Co1
Normal Eigenvalue || Projected Infra Red Intensities
Mode [cm**-1] || [atomic units] [(debye/angs)**2] [(KM/mol)] [arbitrary]
------ ---------- || -------------- ----------------- ---------- -----------
1 -0.000 || 0.000015 0.000 0.015 0.490
2 -0.000 || 0.000016 0.000 0.016 0.532
3 -0.000 || 0.000000 0.000 0.000 0.002
4 -0.000 || 0.000009 0.000 0.009 0.308
5 -0.000 || 0.000001 0.000 0.001 0.048
6 0.000 || 0.000007 0.000 0.007 0.244
7 82.763 || 0.000179 0.004 0.175 5.853
8 85.831 || 0.000178 0.004 0.173 5.805
9 88.594 || 0.000104 0.002 0.102 3.415
10 102.026 || 0.000530 0.012 0.516 17.311
11 117.873 || 0.000005 0.000 0.004 0.150
12 117.983 || 0.000022 0.001 0.022 0.727
13 148.264 || 0.000281 0.006 0.274 9.199
14 152.749 || 0.000291 0.007 0.284 9.522
15 182.388 || 0.001094 0.025 1.067 35.759
16 207.317 || 0.000218 0.005 0.212 7.124
17 236.038 || 0.000243 0.006 0.237 7.957
18 256.459 || 0.002312 0.053 2.254 75.553
----------------------------------------------------------------------------
Pd6Co0
Normal Eigenvalue || Projected Infra Red Intensities
Mode [cm**-1] || [atomic units] [(debye/angs)**2] [(KM/mol)] [arbitrary]
------ ---------- || -------------- ----------------- ---------- -----------
1 -0.000 || 0.000001 0.000 0.001 0.076
2 -0.000 || 0.000002 0.000 0.002 0.138
3 -0.000 || 0.000000 0.000 0.000 0.012
4 0.000 || 0.000000 0.000 0.000 0.029
5 0.000 || 0.000000 0.000 0.000 0.015
6 0.000 || 0.000001 0.000 0.001 0.057
7 99.219 || 0.000004 0.000 0.004 0.298
8 100.765 || 0.000057 0.001 0.056 3.941
9 101.025 || 0.000104 0.002 0.101 7.138
10 110.779 || 0.000001 0.000 0.000 0.035
11 116.768 || 0.000000 0.000 0.000 0.005
12 136.501 || 0.000000 0.000 0.000 0.009
13 136.768 || 0.000000 0.000 0.000 0.004
14 163.407 || 0.000000 0.000 0.000 0.009
15 180.585 || 0.000330 0.008 0.322 22.735
16 184.554 || 0.001065 0.025 1.038 73.263
17 184.869 || 0.001050 0.024 1.023 72.227
18 219.750 || 0.000000 0.000 0.000 0.009
----------------------------------------------------------------------------

## Sheet: egradient
Global Optimization of Small Bimetallic Pd-Co Binary Nanoalloy Clusters: A Genetic Algorithm Approach at the DFT Level
Mikail Aslan, Jack B. A Davis and Roy L. Johnston
Electric field gradient Values of Small Bimetallic Pd-Co Binary Cluster for Electric Polarizability Calculation
Pd0Co3		Pd0Co7
XX YY ZZ XY XZ YZ		XX YY ZZ XY XZ YZ
------------------------------------------------------------------------------------------		------------------------------------------------------------------------------------------
0.152950 0.005304 -0.158254 -0.170785 -0.008839 0.360225		-0.416865 -6.559268 6.976132 -0.077152 0.151555 -0.327481
Pd1Co2		Pd1Co6
XX YY ZZ XY XZ YZ		XX YY ZZ XY XZ YZ
------------------------------------------------------------------------------------------		------------------------------------------------------------------------------------------
-0.361757 0.067481 0.294277 0.079084 0.100432 0.094433		-0.139693 -6.645161 6.784853 -0.147393 -0.103607 -0.279155
Pd2Co1		Pd2Co5
XX YY ZZ XY XZ YZ		XX YY ZZ XY XZ YZ
------------------------------------------------------------------------------------------		------------------------------------------------------------------------------------------
-0.100607 -0.032511 0.133118 0.277769 -0.205689 0.248015		0.264543 -6.483799 6.219256 0.217095 -0.208994 0.652702
Pd3Co0		Pd3Co4
XX YY ZZ XY XZ YZ		XX YY ZZ XY XZ YZ
------------------------------------------------------------------------------------------		------------------------------------------------------------------------------------------
-0.031761 0.006782 0.024978 -0.049945 -0.052236 -0.084558		-1.197719 -4.689857 5.887576 -0.444683 -0.079081 -0.154988
Pd0Co4		Pd4Co3
XX YY ZZ XY XZ YZ		XX YY ZZ XY XZ YZ
------------------------------------------------------------------------------------------		------------------------------------------------------------------------------------------
0.099665 0.090012 -0.189677 0.159796 -0.080320 -0.291150		0.056492 -1.305870 1.249378 -0.020182 -0.012166 0.015183
Pd1Co3		Pd5Co2
Pd2Co2		XX YY ZZ XY XZ YZ
XX YY ZZ XY XZ YZ		------------------------------------------------------------------------------------------
------------------------------------------------------------------------------------------		-0.046327 -1.247699 1.294026 0.051766 -0.049420 0.065116
-0.002595 -0.013351 0.015946 -0.009015 -0.052288 0.039648		Pd6Co1
Pd3Co1		XX YY ZZ XY XZ YZ
XX YY ZZ XY XZ YZ		------------------------------------------------------------------------------------------
------------------------------------------------------------------------------------------		-0.778492 -6.370108 7.148599 -0.344265 -0.355142 0.738995
-0.014218 0.078189 -0.063971 -0.029102 -0.121313 -0.029725		Pd7Co0
Pd4Co0		XX YY ZZ XY XZ YZ
XX YY ZZ XY XZ YZ		------------------------------------------------------------------------------------------
------------------------------------------------------------------------------------------		-0.037000 -1.290555 1.327555 0.018350 -0.060746 -0.035625
-0.058344 -0.006666 0.065011 -0.100862 -0.013963 0.029934
Pd0Co5
XX YY ZZ XY XZ YZ
------------------------------------------------------------------------------------------
-0.434455 0.229805 0.204650 0.325037 0.216658 -0.100141
Pd1Co4
XX YY ZZ XY XZ YZ
------------------------------------------------------------------------------------------
0.014323 -0.030913 0.016590 -0.184225 0.210298 -0.187491
Pd2Co3
XX YY ZZ XY XZ YZ
------------------------------------------------------------------------------------------
-0.005516 0.022021 -0.016504 0.011384 0.056655 -0.010866
Pd3Co2
XX YY ZZ XY XZ YZ
------------------------------------------------------------------------------------------
-0.351446 0.565845 -0.214399 -0.052397 0.078420 0.120755
Pd4Co1
XX YY ZZ XY XZ YZ
------------------------------------------------------------------------------------------
-0.101637 0.017872 0.083765 0.088068 -0.012765 0.022136
Pd5Co0
XX YY ZZ XY XZ YZ
------------------------------------------------------------------------------------------
-0.056818 0.020323 0.036496 -0.061893 -0.030702 -0.060768
Pd0Co6
XX YY ZZ XY XZ YZ
------------------------------------------------------------------------------------------
0.243308 0.244007 -0.487315 0.000334 0.000016 0.000448
Pd1Co5
XX YY ZZ XY XZ YZ
------------------------------------------------------------------------------------------
0.113438 -0.078965 -0.034473 0.095834 0.023493 0.246006
Pd2Co4
XX YY ZZ XY XZ YZ
------------------------------------------------------------------------------------------
-0.760109 0.064653 0.695456 0.209081 0.426395 0.182410
Pd3Co3
XX YY ZZ XY XZ YZ
------------------------------------------------------------------------------------------
0.014528 0.041617 -0.056144 -0.002070 -0.000536 -0.014751
Pd4Co2
XX YY ZZ XY XZ YZ
------------------------------------------------------------------------------------------
0.001985 0.038083 -0.040069 -0.001573 0.040160 0.043702
Pd5Co1
XX YY ZZ XY XZ YZ
------------------------------------------------------------------------------------------
0.067310 -0.070642 0.003332 -0.040841 0.034527 0.113063
Pd6Co0
XX YY ZZ XY XZ YZ
------------------------------------------------------------------------------------------
-0.029787 -0.022808 0.052596 -0.019804 0.041019 -0.048753

## Sheet: moment
Global Optimization of Small Bimetallic Pd-Co Binary Nanoalloy Clusters: A Genetic Algorithm Approach at the DFT Level
Mikail Aslan, Jack B. A Davis and Roy L. Johnston
Dipole, quadrupole and octupole Moments of Small Bimetallic Pd-Co Binary Clusters
Pd0Co3		Pd0Co7
Total dipole 0.4011891030 DEBYE(S)		Total dipole 0.3072470494 DEBYE(S)
Quadrupole moments in atomic units		Quadrupole moments in atomic units
Component Electronic+nuclear Point charges Total		Component Electronic+nuclear Point charges Total
--------------------------------------------------------------------------		--------------------------------------------------------------------------
XX 2.4129564759 0.0000000000 2.4129564759		XX -2.2693228660 0.0000000000 -2.2693228660
YY -2.3979055548 0.0000000000 -2.3979055548		YY 5.3382520986 0.0000000000 5.3382520986
ZZ -0.0150509211 0.0000000000 -0.0150509211		ZZ -3.0689292326 0.0000000000 -3.0689292326
XY -0.3210559510 0.0000000000 -0.3210559510		XY -3.1414223847 0.0000000000 -3.1414223847
XZ 3.8594447364 0.0000000000 3.8594447364		XZ -0.8915805598 0.0000000000 -0.8915805598
YZ -1.3044581145 0.0000000000 -1.3044581145		YZ 2.2506216912 0.0000000000 2.2506216912
Octupole moments in atomic units		Octupole moments in atomic units
Component Electronic+nuclear Point charges Total		Component Electronic+nuclear Point charges Total
--------------------------------------------------------------------------		--------------------------------------------------------------------------
XXX -3.6123114508 0.0000000000 -3.6123114508		XXX -16.4020581351 0.0000000000 -16.4020581351
YYY -2.8877530660 0.0000000000 -2.8877530660		YYY -23.3005738932 0.0000000000 -23.3005738932
ZZZ 10.7579947150 0.0000000000 10.7579947150		ZZZ 15.4287719629 0.0000000000 15.4287719629
XXY -5.8714757340 0.0000000000 -5.8714757340		XXY 9.5024900430 0.0000000000 9.5024900430
XXZ -14.9188451287 0.0000000000 -14.9188451287		XXZ -0.6905356924 0.0000000000 -0.6905356924
YYX 10.8934758139 0.0000000000 10.8934758139		YYX 23.8713181971 0.0000000000 23.8713181971
YYZ 4.1608504137 0.0000000000 4.1608504137		YYZ -14.7382362705 0.0000000000 -14.7382362705
ZZX -7.2811643631 0.0000000000 -7.2811643631		ZZX -7.4692600620 0.0000000000 -7.4692600620
ZZY 8.7592288000 0.0000000000 8.7592288000		ZZY 13.7980838502 0.0000000000 13.7980838502
XYZ 6.0770806439 0.0000000000 6.0770806439		XYZ 6.6165546706 0.0000000000 6.6165546706
Pd1Co2		Pd1Co6
Total dipole 1.1609613577 DEBYE(S)		Total dipole 0.8515255064 DEBYE(S)
Quadrupole moments in atomic units		Quadrupole moments in atomic units
Component Electronic+nuclear Point charges Total		Component Electronic+nuclear Point charges Total
--------------------------------------------------------------------------		--------------------------------------------------------------------------
XX -3.1909346032 0.0000000000 -3.1909346032		XX -1.4181479435 0.0000000000 -1.4181479435
YY 1.9043322565 0.0000000000 1.9043322565		YY 2.7590433970 0.0000000000 2.7590433970
ZZ 1.2866023467 0.0000000000 1.2866023467		ZZ -1.3408954535 0.0000000000 -1.3408954535
XY 1.4696217489 0.0000000000 1.4696217489		XY -1.3837316950 0.0000000000 -1.3837316950
XZ -3.4365717867 0.0000000000 -3.4365717867		XZ 0.4532048254 0.0000000000 0.4532048254
YZ 1.1044272336 0.0000000000 1.1044272336		YZ -1.5015704700 0.0000000000 -1.5015704700
Octupole moments in atomic units		Octupole moments in atomic units
Component Electronic+nuclear Point charges Total		Component Electronic+nuclear Point charges Total
--------------------------------------------------------------------------		--------------------------------------------------------------------------
XXX -3.5780276772 0.0000000000 -3.5780276772		XXX -10.1215136596 0.0000000000 -10.1215136596
YYY 19.2237546781 0.0000000000 19.2237546781		YYY -15.9042418471 0.0000000000 -15.9042418471
ZZZ 6.8245971752 0.0000000000 6.8245971752		ZZZ -13.4382211066 0.0000000000 -13.4382211066
XXY 0.1363916900 0.0000000000 0.1363916900		XXY 9.3580727806 0.0000000000 9.3580727806
XXZ 6.5722220880 0.0000000000 6.5722220880		XXZ -0.4663596711 0.0000000000 -0.4663596711
YYX 12.5591822544 0.0000000000 12.5591822544		YYX 13.3893431616 0.0000000000 13.3893431616
YYZ -13.3968192632 0.0000000000 -13.3968192632		YYZ 13.9045807777 0.0000000000 13.9045807777
ZZX -8.9811545772 0.0000000000 -8.9811545772		ZZX -3.2678295020 0.0000000000 -3.2678295020
ZZY -19.3601463681 0.0000000000 -19.3601463681		ZZY 6.5461690666 0.0000000000 6.5461690666
XYZ 6.3258028081 0.0000000000 6.3258028081		XYZ -5.2211487123 0.0000000000 -5.2211487123
Pd2Co1		Pd2Co5
Total dipole 0.7477299740 DEBYE(S)		Total dipole 0.6379810312 DEBYE(S)
Quadrupole moments in atomic units		Quadrupole moments in atomic units
Component Electronic+nuclear Point charges Total		Component Electronic+nuclear Point charges Total
--------------------------------------------------------------------------		--------------------------------------------------------------------------
XX -0.2062811030 0.0000000000 -0.2062811030		XX -2.6715286589 0.0000000000 -2.6715286589
YY -0.4015201319 0.0000000000 -0.4015201319		YY -0.0102048440 0.0000000000 -0.0102048440
ZZ 0.6078012349 0.0000000000 0.6078012349		ZZ 2.6817335029 0.0000000000 2.6817335029
XY 3.7261813371 0.0000000000 3.7261813371		XY 0.1953621698 0.0000000000 0.1953621698
XZ -2.6532634155 0.0000000000 -2.6532634155		XZ 0.6595249231 0.0000000000 0.6595249231
YZ 1.6964654444 0.0000000000 1.6964654444		YZ -2.3576268958 0.0000000000 -2.3576268958
Octupole moments in atomic units		Octupole moments in atomic units
Component Electronic+nuclear Point charges Total		Component Electronic+nuclear Point charges Total
--------------------------------------------------------------------------		--------------------------------------------------------------------------
XXX 13.7710864035 0.0000000000 13.7710864035		XXX -8.8586758995 0.0000000000 -8.8586758995
YYY -9.3261290525 0.0000000000 -9.3261290525		YYY 17.1199980957 0.0000000000 17.1199980957
ZZZ 18.6378591554 0.0000000000 18.6378591554		ZZZ -1.1826018607 0.0000000000 -1.1826018607
XXY 7.7989666268 0.0000000000 7.7989666268		XXY 0.2253157462 0.0000000000 0.2253157462
XXZ -3.6038301463 0.0000000000 -3.6038301463		XXZ -5.2244215375 0.0000000000 -5.2244215375
YYX -1.1106915129 0.0000000000 -1.1106915129		YYX 2.8646907080 0.0000000000 2.8646907080
YYZ -15.0340290091 0.0000000000 -15.0340290091		YYZ 6.4070233982 0.0000000000 6.4070233982
ZZX -12.6603948906 0.0000000000 -12.6603948906		ZZX 5.9939851916 0.0000000000 5.9939851916
ZZY 1.5271624257 0.0000000000 1.5271624257		ZZY -17.3453138419 0.0000000000 -17.3453138419
XYZ -13.4815090081 0.0000000000 -13.4815090081		XYZ -11.0744254497 0.0000000000 -11.0744254497
Pd3Co0		Pd3Co4
Total dipole 0.1317773604 DEBYE(S)		Total dipole 0.6109364835 DEBYE(S)
Quadrupole moments in atomic units		Quadrupole moments in atomic units
Component Electronic+nuclear Point charges Total		Component Electronic+nuclear Point charges Total
--------------------------------------------------------------------------		--------------------------------------------------------------------------
XX 3.0785981716 0.0000000000 3.0785981716		XX 0.7848060247 0.0000000000 0.7848060247
YY -0.8293412778 0.0000000000 -0.8293412778		YY -0.9230997275 0.0000000000 -0.9230997275
ZZ -2.2492568938 0.0000000000 -2.2492568938		ZZ 0.1382937028 0.0000000000 0.1382937028
XY -0.3016165305 0.0000000000 -0.3016165305		XY -0.1592791710 0.0000000000 -0.1592791710
XZ 0.4052789597 0.0000000000 0.4052789597		XZ -0.0633566277 0.0000000000 -0.0633566277
YZ 4.6082869421 0.0000000000 4.6082869421		YZ -1.1417687781 0.0000000000 -1.1417687781
Octupole moments in atomic units		Octupole moments in atomic units
Component Electronic+nuclear Point charges Total		Component Electronic+nuclear Point charges Total
--------------------------------------------------------------------------		--------------------------------------------------------------------------
XXX -26.7182804031 0.0000000000 -26.7182804031		XXX -3.4558394656 0.0000000000 -3.4558394656
YYY -4.2461283826 0.0000000000 -4.2461283826		YYY 10.6985576641 0.0000000000 10.6985576641
ZZZ 0.0978517181 0.0000000000 0.0978517181		ZZZ -0.6672417718 0.0000000000 -0.6672417718
XXY 6.1173495671 0.0000000000 6.1173495671		XXY -14.5516564740 0.0000000000 -14.5516564740
XXZ 3.2699291931 0.0000000000 3.2699291931		XXZ -8.2291088632 0.0000000000 -8.2291088632
YYX 15.0151115197 0.0000000000 15.0151115197		YYX -3.1174031052 0.0000000000 -3.1174031052
YYZ -3.3677809111 0.0000000000 -3.3677809111		YYZ 8.8963506351 0.0000000000 8.8963506351
ZZX 11.7031688834 0.0000000000 11.7031688834		ZZX 6.5732425709 0.0000000000 6.5732425709
ZZY -1.8712211844 0.0000000000 -1.8712211844		ZZY 3.8530988099 0.0000000000 3.8530988099
XYZ 12.8831951615 0.0000000000 12.8831951615		XYZ 4.3752691055 0.0000000000 4.3752691055
Pd0Co4		Pd4Co3
Total dipole 0.0492224122 DEBYE(S)		Total dipole 0.3428733969 DEBYE(S)
Quadrupole moments in atomic units		Quadrupole moments in atomic units
Component Electronic+nuclear Point charges Total		Component Electronic+nuclear Point charges Total
--------------------------------------------------------------------------		--------------------------------------------------------------------------
XX 0.2871083283 0.0000000000 0.2871083283		XX 0.1483356475 0.0000000000 0.1483356475
YY -0.1691780736 0.0000000000 -0.1691780736		YY -0.1513658294 0.0000000000 -0.1513658294
ZZ -0.1179302548 0.0000000000 -0.1179302548		ZZ 0.0030301819 0.0000000000 0.0030301819
XY 0.4012663615 0.0000000000 0.4012663615		XY -0.0836986313 0.0000000000 -0.0836986313
XZ 0.3672386283 0.0000000000 0.3672386283		XZ -0.2286907819 0.0000000000 -0.2286907819
YZ -0.6636731513 0.0000000000 -0.6636731513		YZ -0.1680888541 0.0000000000 -0.1680888541
Octupole moments in atomic units		Octupole moments in atomic units
Component Electronic+nuclear Point charges Total		Component Electronic+nuclear Point charges Total
--------------------------------------------------------------------------		--------------------------------------------------------------------------
XXX 3.3025881444 0.0000000000 3.3025881444		XXX -10.0116553447 0.0000000000 -10.0116553447
YYY 5.6000540951 0.0000000000 5.6000540951		YYY -2.8515830034 0.0000000000 -2.8515830034
ZZZ -3.3024603934 0.0000000000 -3.3024603934		ZZZ -3.0710206732 0.0000000000 -3.0710206732
XXY -3.9703109301 0.0000000000 -3.9703109301		XXY 1.0127726539 0.0000000000 1.0127726539
XXZ 2.0191688971 0.0000000000 2.0191688971		XXZ 17.9026266020 0.0000000000 17.9026266020
YYX 2.5128192182 0.0000000000 2.5128192182		YYX -6.8770306125 0.0000000000 -6.8770306125
YYZ 1.2832914963 0.0000000000 1.2832914963		YYZ -14.8316059289 0.0000000000 -14.8316059289
ZZX -5.8154073626 0.0000000000 -5.8154073626		ZZX 16.8886859571 0.0000000000 16.8886859571
ZZY -1.6297431649 0.0000000000 -1.6297431649		ZZY 1.8388103495 0.0000000000 1.8388103495
XYZ -1.5373004378 0.0000000000 -1.5373004378		XYZ -1.9461197516 0.0000000000 -1.9461197516
Pd1Co3		Pd5Co2
Total dipole 1.3897490399 DEBYE(S)		Total dipole 0.7512940275 DEBYE(S)
Quadrupole moments in atomic units		Quadrupole moments in atomic units
Component Electronic+nuclear Point charges Total		Component Electronic+nuclear Point charges Total
--------------------------------------------------------------------------		--------------------------------------------------------------------------
XX -1.5869118630 0.0000000000 -1.5869118630		XX 1.3047219400 0.0000000000 1.3047219400
YY -1.2499610781 0.0000000000 -1.2499610781		YY -1.6604660862 0.0000000000 -1.6604660862
ZZ 2.8368729411 0.0000000000 2.8368729411		ZZ 0.3557441462 0.0000000000 0.3557441462
XY 2.2053198649 0.0000000000 2.2053198649		XY 0.9731498815 0.0000000000 0.9731498815
XZ -2.3969451545 0.0000000000 -2.3969451545		XZ -0.5425043994 0.0000000000 -0.5425043994
YZ -1.1450522850 0.0000000000 -1.1450522850		YZ 1.8183665764 0.0000000000 1.8183665764
Octupole moments in atomic units		Octupole moments in atomic units
Component Electronic+nuclear Point charges Total		Component Electronic+nuclear Point charges Total
--------------------------------------------------------------------------		--------------------------------------------------------------------------
XXX -4.1012782354 0.0000000000 -4.1012782354		XXX 13.5729965293 0.0000000000 13.5729965293
YYY 8.8758219531 0.0000000000 8.8758219531		YYY -8.9893677911 0.0000000000 -8.9893677911
ZZZ -1.8387818886 0.0000000000 -1.8387818886		ZZZ 11.3574717927 0.0000000000 11.3574717927
XXY -5.4038588154 0.0000000000 -5.4038588154		XXY -10.8801208523 0.0000000000 -10.8801208523
XXZ -10.5419163888 0.0000000000 -10.5419163888		XXZ 12.8291816768 0.0000000000 12.8291816768
YYX 3.2723404664 0.0000000000 3.2723404664		YYX -6.9069640488 0.0000000000 -6.9069640488
YYZ 12.3806982774 0.0000000000 12.3806982774		YYZ -24.1866534695 0.0000000000 -24.1866534695
ZZX 0.8289377690 0.0000000000 0.8289377690		ZZX -6.6660324805 0.0000000000 -6.6660324805
ZZY -3.4719631377 0.0000000000 -3.4719631377		ZZY 19.8694886435 0.0000000000 19.8694886435
XYZ 0.8853147539 0.0000000000 0.8853147539		XYZ 12.6902670345 0.0000000000 12.6902670345
Pd2Co2		Pd6Co1
Total dipole 1.3517828098 DEBYE(S)		Total dipole 0.3891693403 DEBYE(S)
Quadrupole moments in atomic units		Quadrupole moments in atomic units
Component Electronic+nuclear Point charges Total		Component Electronic+nuclear Point charges Total
--------------------------------------------------------------------------		--------------------------------------------------------------------------
XX 0.6408778251 0.0000000000 0.6408778251		XX 2.3701813897 0.0000000000 2.3701813897
YY 0.6047371018 0.0000000000 0.6047371018		YY -2.9038718892 0.0000000000 -2.9038718892
ZZ -1.2456149268 0.0000000000 -1.2456149268		ZZ 0.5336904995 0.0000000000 0.5336904995
XY 0.3212283120 0.0000000000 0.3212283120		XY 1.7819507491 0.0000000000 1.7819507491
XZ 0.9183714714 0.0000000000 0.9183714714		XZ 1.0294852211 0.0000000000 1.0294852211
YZ 0.3679954965 0.0000000000 0.3679954965		YZ -3.9888425430 0.0000000000 -3.9888425430
Octupole moments in atomic units		Octupole moments in atomic units
Component Electronic+nuclear Point charges Total		Component Electronic+nuclear Point charges Total
--------------------------------------------------------------------------		--------------------------------------------------------------------------
XXX 25.5956122054 0.0000000000 25.5956122054		XXX -3.5804087962 0.0000000000 -3.5804087962
YYY -24.0083603246 0.0000000000 -24.0083603246		YYY -1.1494564924 0.0000000000 -1.1494564924
ZZZ -8.6401944861 0.0000000000 -8.6401944861		ZZZ 5.0623213761 0.0000000000 5.0623213761
XXY 1.3229938200 0.0000000000 1.3229938200		XXY 3.2026098576 0.0000000000 3.2026098576
XXZ 24.1857748440 0.0000000000 24.1857748440		XXZ 1.6590623254 0.0000000000 1.6590623254
YYX -17.3888842671 0.0000000000 -17.3888842671		YYX 3.1974872730 0.0000000000 3.1974872730
YYZ -15.5455803578 0.0000000000 -15.5455803578		YYZ -6.7213837016 0.0000000000 -6.7213837016
ZZX -8.2067279383 0.0000000000 -8.2067279383		ZZX 0.3829215232 0.0000000000 0.3829215232
ZZY 22.6853665046 0.0000000000 22.6853665046		ZZY -2.0531533652 0.0000000000 -2.0531533652
XYZ -10.3178736228 0.0000000000 -10.3178736228		XYZ 2.5896333211 0.0000000000 2.5896333211
Pd3Co1		Pd7Co0
Total dipole 0.8408304092 DEBYE(S)		Total dipole 0.0091322496 DEBYE(S)
Quadrupole moments in atomic units		Quadrupole moments in atomic units
Component Electronic+nuclear Point charges Total		Component Electronic+nuclear Point charges Total
--------------------------------------------------------------------------		--------------------------------------------------------------------------
XX 0.6144111328 0.0000000000 0.6144111328		XX -1.8120294380 0.0000000000 -1.8120294380
YY -0.2765992709 0.0000000000 -0.2765992709		YY 1.4844758554 0.0000000000 1.4844758554
ZZ -0.3378118619 0.0000000000 -0.3378118619		ZZ 0.3275535826 0.0000000000 0.3275535826
XY 0.7984823336 0.0000000000 0.7984823336		XY -3.3032202638 0.0000000000 -3.3032202638
XZ 0.7522085458 0.0000000000 0.7522085458		XZ 4.1167156952 0.0000000000 4.1167156952
YZ 0.4398835972 0.0000000000 0.4398835972		YZ 2.5258180406 0.0000000000 2.5258180406
Octupole moments in atomic units		Octupole moments in atomic units
Component Electronic+nuclear Point charges Total		Component Electronic+nuclear Point charges Total
--------------------------------------------------------------------------		--------------------------------------------------------------------------
XXX -5.9446191520 0.0000000000 -5.9446191520		XXX -0.0608136512 0.0000000000 -0.0608136512
YYY -35.4011984425 0.0000000000 -35.4011984425		YYY -0.3699668802 0.0000000000 -0.3699668802
ZZZ -26.7025154828 0.0000000000 -26.7025154828		ZZZ -0.3671477758 0.0000000000 -0.3671477758
XXY 16.0449109457 0.0000000000 16.0449109457		XXY 0.4487112415 0.0000000000 0.4487112415
XXZ 26.8790289829 0.0000000000 26.8790289829		XXZ 0.4907099862 0.0000000000 0.4907099862
YYX 14.0314152419 0.0000000000 14.0314152419		YYX -0.1465009277 0.0000000000 -0.1465009277
YYZ -0.1765135001 0.0000000000 -0.1765135001		YYZ -0.1235622104 0.0000000000 -0.1235622104
ZZX -8.0867960899 0.0000000000 -8.0867960899		ZZX 0.2073145790 0.0000000000 0.2073145790
ZZY 19.3562874968 0.0000000000 19.3562874968		ZZY -0.0787443613 0.0000000000 -0.0787443613
XYZ 4.6320801021 0.0000000000 4.6320801021		XYZ 0.3079037837 0.0000000000 0.3079037837
Pd4Co0
Total dipole 0.0010817918 DEBYE(S)
Quadrupole moments in atomic units
Component Electronic+nuclear Point charges Total
--------------------------------------------------------------------------
XX -0.0983072121 0.0000000000 -0.0983072121
YY 0.0349873338 0.0000000000 0.0349873338
ZZ 0.0633198784 0.0000000000 0.0633198784
XY -0.0490583518 0.0000000000 -0.0490583518
XZ 0.0612058509 0.0000000000 0.0612058509
YZ -0.1406023341 0.0000000000 -0.1406023341
Octupole moments in atomic units
Component Electronic+nuclear Point charges Total
--------------------------------------------------------------------------
XXX -17.1231024785 0.0000000000 -17.1231024785
YYY -6.4301381802 0.0000000000 -6.4301381802
ZZZ 36.2153143616 0.0000000000 36.2153143616
XXY 0.2146520785 0.0000000000 0.2146520785
XXZ -22.2108326693 0.0000000000 -22.2108326693
YYX 32.1254002240 0.0000000000 32.1254002240
YYZ -14.0044816923 0.0000000000 -14.0044816923
ZZX -15.0022977455 0.0000000000 -15.0022977455
ZZY 6.2154861017 0.0000000000 6.2154861017
XYZ -3.9195411285 0.0000000000 -3.9195411285
Pd0Co5
Total dipole 0.5311572816 DEBYE(S)
Quadrupole moments in atomic units
Component Electronic+nuclear Point charges Total
--------------------------------------------------------------------------
XX 1.7322798671 0.0000000000 1.7322798671
YY 2.0798302419 0.0000000000 2.0798302419
ZZ -3.8121101090 0.0000000000 -3.8121101090
XY 0.3287778809 0.0000000000 0.3287778809
XZ -1.5493300498 0.0000000000 -1.5493300498
YZ -0.5979153295 0.0000000000 -0.5979153295
Octupole moments in atomic units
Component Electronic+nuclear Point charges Total
--------------------------------------------------------------------------
XXX 6.1963292813 0.0000000000 6.1963292813
YYY -30.9694365099 0.0000000000 -30.9694365099
ZZZ -4.5069551365 0.0000000000 -4.5069551365
XXY 11.1940032331 0.0000000000 11.1940032331
XXZ 0.9041738716 0.0000000000 0.9041738716
YYX -9.6430008243 0.0000000000 -9.6430008243
YYZ 3.6027812649 0.0000000000 3.6027812649
ZZX 3.4466715430 0.0000000000 3.4466715430
ZZY 19.7754332768 0.0000000000 19.7754332768
XYZ 2.4019511322 0.0000000000 2.4019511322
Pd1Co4
Total dipole 0.8721341005 DEBYE(S)
Quadrupole moments in atomic units
Component Electronic+nuclear Point charges Total
--------------------------------------------------------------------------
XX -0.1312955394 0.0000000000 -0.1312955394
YY 0.2858073925 0.0000000000 0.2858073925
ZZ -0.1545118531 0.0000000000 -0.1545118531
XY 1.8215149669 0.0000000000 1.8215149669
XZ -2.0723373718 0.0000000000 -2.0723373718
YZ 1.8562644967 0.0000000000 1.8562644967
Octupole moments in atomic units
Component Electronic+nuclear Point charges Total
--------------------------------------------------------------------------
XXX 11.8611954906 0.0000000000 11.8611954906
YYY -12.3519093611 0.0000000000 -12.3519093611
ZZZ 9.1981912781 0.0000000000 9.1981912781
XXY -4.4399520313 0.0000000000 -4.4399520313
XXZ -15.4969743901 0.0000000000 -15.4969743901
YYX -17.8226370406 0.0000000000 -17.8226370406
YYZ 6.2987831120 0.0000000000 6.2987831120
ZZX 5.9614415499 0.0000000000 5.9614415499
ZZY 16.7918613924 0.0000000000 16.7918613924
XYZ -14.7449020439 0.0000000000 -14.7449020439
Pd2Co3
Total dipole 0.1450351522 DEBYE(S)
Quadrupole moments in atomic units
Component Electronic+nuclear Point charges Total
--------------------------------------------------------------------------
XX -1.1893166421 0.0000000000 -1.1893166421
YY 1.4694648213 0.0000000000 1.4694648213
ZZ -0.2801481792 0.0000000000 -0.2801481792
XY 2.0967510364 0.0000000000 2.0967510364
XZ 3.4506450548 0.0000000000 3.4506450548
YZ -2.0991233658 0.0000000000 -2.0991233658
Octupole moments in atomic units
Component Electronic+nuclear Point charges Total
--------------------------------------------------------------------------
XXX -5.2059841309 0.0000000000 -5.2059841309
YYY 22.6937493102 0.0000000000 22.6937493102
ZZZ 12.9038279293 0.0000000000 12.9038279293
XXY -16.1026610298 0.0000000000 -16.1026610298
XXZ 0.4708302739 0.0000000000 0.4708302739
YYX -2.9770765177 0.0000000000 -2.9770765177
YYZ -13.3746582032 0.0000000000 -13.3746582032
ZZX 8.1830606486 0.0000000000 8.1830606486
ZZY -6.5910882804 0.0000000000 -6.5910882804
XYZ -14.1066799952 0.0000000000 -14.1066799952
Pd3Co2
Total dipole 0.8894082565 DEBYE(S)
Quadrupole moments in atomic units
Component Electronic+nuclear Point charges Total
--------------------------------------------------------------------------
XX -0.4234376051 0.0000000000 -0.4234376051
YY -0.4562158752 0.0000000000 -0.4562158752
ZZ 0.8796534803 0.0000000000 0.8796534803
XY -0.2461315238 0.0000000000 -0.2461315238
XZ 0.9653030913 0.0000000000 0.9653030913
YZ -0.3832304229 0.0000000000 -0.3832304229
Octupole moments in atomic units
Component Electronic+nuclear Point charges Total
--------------------------------------------------------------------------
XXX 0.0828812825 0.0000000000 0.0828812825
YYY -20.5166712770 0.0000000000 -20.5166712770
ZZZ 15.5002377763 0.0000000000 15.5002377763
XXY 4.3572662207 0.0000000000 4.3572662207
XXZ 1.4185773155 0.0000000000 1.4185773155
YYX -6.6151401984 0.0000000000 -6.6151401984
YYZ -16.9188150918 0.0000000000 -16.9188150918
ZZX 6.5322589159 0.0000000000 6.5322589159
ZZY 16.1594050563 0.0000000000 16.1594050563
XYZ 11.1203962573 0.0000000000 11.1203962573
Pd4Co1
Total dipole 0.6739361266 DEBYE(S)
Quadrupole moments in atomic units
Component Electronic+nuclear Point charges Total
--------------------------------------------------------------------------
XX 0.5139513923 0.0000000000 0.5139513923
YY -1.7874019771 0.0000000000 -1.7874019771
ZZ 1.2734505847 0.0000000000 1.2734505847
XY -0.6533471887 0.0000000000 -0.6533471887
XZ 2.4943767980 0.0000000000 2.4943767980
YZ 0.4374740821 0.0000000000 0.4374740821
Octupole moments in atomic units
Component Electronic+nuclear Point charges Total
--------------------------------------------------------------------------
XXX -6.7739237408 0.0000000000 -6.7739237408
YYY 25.5097175768 0.0000000000 25.5097175768
ZZZ 2.5610643910 0.0000000000 2.5610643910
XXY -14.0853944511 0.0000000000 -14.0853944511
XXZ 7.8920125490 0.0000000000 7.8920125490
YYX 12.9327005583 0.0000000000 12.9327005583
YYZ -10.4530769400 0.0000000000 -10.4530769400
ZZX -6.1587768176 0.0000000000 -6.1587768176
ZZY -11.4243231257 0.0000000000 -11.4243231257
XYZ 11.3737387058 0.0000000000 11.3737387058
Pd5Co0
Total dipole 0.3113456163 DEBYE(S)
Quadrupole moments in atomic units
Component Electronic+nuclear Point charges Total
--------------------------------------------------------------------------
XX 1.5099218218 0.0000000000 1.5099218218
YY -1.2757710676 0.0000000000 -1.2757710676
ZZ -0.2341507542 0.0000000000 -0.2341507542
XY 0.7943585006 0.0000000000 0.7943585006
XZ -0.8013722335 0.0000000000 -0.8013722335
YZ 2.5173622465 0.0000000000 2.5173622465
Octupole moments in atomic units
Component Electronic+nuclear Point charges Total
--------------------------------------------------------------------------
XXX 13.5304178291 0.0000000000 13.5304178291
YYY -2.7572433166 0.0000000000 -2.7572433166
ZZZ 14.7820518605 0.0000000000 14.7820518605
XXY -13.0081387371 0.0000000000 -13.0081387371
XXZ 10.9067652444 0.0000000000 10.9067652444
YYX -9.3980574032 0.0000000000 -9.3980574032
YYZ -25.6888171049 0.0000000000 -25.6888171049
ZZX -4.1323604260 0.0000000000 -4.1323604260
ZZY 15.7653820538 0.0000000000 15.7653820538
XYZ 11.3110458403 0.0000000000 11.3110458403
Pd0Co6
Total dipole 0.0002264601 DEBYE(S)
Quadrupole moments in atomic units
Component Electronic+nuclear Point charges Total
--------------------------------------------------------------------------
XX 0.0492394753 0.0000000000 0.0492394753
YY 0.0440960028 0.0000000000 0.0440960028
ZZ -0.0933354782 0.0000000000 -0.0933354782
XY -0.0007322397 0.0000000000 -0.0007322397
XZ 0.0003998691 0.0000000000 0.0003998691
YZ -0.0064743337 0.0000000000 -0.0064743337
Octupole moments in atomic units
Component Electronic+nuclear Point charges Total
--------------------------------------------------------------------------
XXX 0.0011183538 0.0000000000 0.0011183538
YYY -0.0013076958 0.0000000000 -0.0013076958
ZZZ 0.0036468198 0.0000000000 0.0036468198
XXY 0.0002326368 0.0000000000 0.0002326368
XXZ -0.0040692815 0.0000000000 -0.0040692815
YYX 0.0000146805 0.0000000000 0.0000146805
YYZ 0.0004224617 0.0000000000 0.0004224617
ZZX -0.0011330343 0.0000000000 -0.0011330343
ZZY 0.0010750590 0.0000000000 0.0010750590
XYZ 0.0000074717 0.0000000000 0.0000074717
Pd1Co5
Total dipole 0.5242390875 DEBYE(S)
Quadrupole moments in atomic units
Component Electronic+nuclear Point charges Total
--------------------------------------------------------------------------
XX -0.6782639758 0.0000000000 -0.6782639758
YY 0.2979809539 0.0000000000 0.2979809539
ZZ 0.3802830218 0.0000000000 0.3802830218
XY 0.5794387939 0.0000000000 0.5794387939
XZ 0.4823737507 0.0000000000 0.4823737507
YZ -0.2272672124 0.0000000000 -0.2272672124
Octupole moments in atomic units
Component Electronic+nuclear Point charges Total
--------------------------------------------------------------------------
XXX 2.0665780865 0.0000000000 2.0665780865
YYY 3.3763657991 0.0000000000 3.3763657991
ZZZ 3.1431001988 0.0000000000 3.1431001988
XXY -4.0381716041 0.0000000000 -4.0381716041
XXZ -3.3861623410 0.0000000000 -3.3861623410
YYX -0.6466986529 0.0000000000 -0.6466986529
YYZ 0.2430621422 0.0000000000 0.2430621422
ZZX -1.4198794336 0.0000000000 -1.4198794336
ZZY 0.6618058049 0.0000000000 0.6618058049
XYZ 2.1831701263 0.0000000000 2.1831701263
Pd2Co4
Total dipole 0.2504603401 DEBYE(S)
Quadrupole moments in atomic units
Component Electronic+nuclear Point charges Total
--------------------------------------------------------------------------
XX 0.6934651926 0.0000000000 0.6934651926
YY 1.5704724672 0.0000000000 1.5704724672
ZZ -2.2639376598 0.0000000000 -2.2639376598
XY 0.1340449461 0.0000000000 0.1340449461
XZ -0.5290466726 0.0000000000 -0.5290466726
YZ -0.5731166994 0.0000000000 -0.5731166994
Octupole moments in atomic units
Component Electronic+nuclear Point charges Total
--------------------------------------------------------------------------
XXX 7.4604495664 0.0000000000 7.4604495664
YYY 4.7167276411 0.0000000000 4.7167276411
ZZZ -20.4191753426 0.0000000000 -20.4191753426
XXY 1.6956370695 0.0000000000 1.6956370695
XXZ 8.3379266676 0.0000000000 8.3379266676
YYX 3.4266439433 0.0000000000 3.4266439433
YYZ 12.0812486750 0.0000000000 12.0812486750
ZZX -10.8870935097 0.0000000000 -10.8870935097
ZZY -6.4123647106 0.0000000000 -6.4123647106
XYZ -1.6236265010 0.0000000000 -1.6236265010
Pd3Co3
Total dipole 0.7183357889 DEBYE(S)
Quadrupole moments in atomic units
Component Electronic+nuclear Point charges Total
--------------------------------------------------------------------------
XX 0.4449758231 0.0000000000 0.4449758231
YY 2.1440207673 0.0000000000 2.1440207673
ZZ -2.5889965904 0.0000000000 -2.5889965904
XY 0.1937869207 0.0000000000 0.1937869207
XZ -0.3776037489 0.0000000000 -0.3776037489
YZ -1.7827110087 0.0000000000 -1.7827110087
Octupole moments in atomic units
Component Electronic+nuclear Point charges Total
--------------------------------------------------------------------------
XXX 5.2135903677 0.0000000000 5.2135903677
YYY -12.4819447505 0.0000000000 -12.4819447505
ZZZ -14.6381158607 0.0000000000 -14.6381158607
XXY 11.8041917841 0.0000000000 11.8041917841
XXZ -10.4950304043 0.0000000000 -10.4950304043
YYX -4.2789423605 0.0000000000 -4.2789423605
YYZ 25.1331462651 0.0000000000 25.1331462651
ZZX -0.9346480071 0.0000000000 -0.9346480071
ZZY 0.6777529664 0.0000000000 0.6777529664
XYZ 5.6130360256 0.0000000000 5.6130360256
Pd4Co2
Total dipole 0.0508360502 DEBYE(S)
Quadrupole moments in atomic units
Component Electronic+nuclear Point charges Total
--------------------------------------------------------------------------
XX -1.2238930650 0.0000000000 -1.2238930650
YY 2.1102959482 0.0000000000 2.1102959482
ZZ -0.8864028832 0.0000000000 -0.8864028832
XY -0.1288193952 0.0000000000 -0.1288193952
XZ 2.4118451986 0.0000000000 2.4118451986
YZ 4.1683083609 0.0000000000 4.1683083609
Octupole moments in atomic units
Component Electronic+nuclear Point charges Total
--------------------------------------------------------------------------
XXX -9.5345302911 0.0000000000 -9.5345302911
YYY 0.1342440725 0.0000000000 0.1342440725
ZZZ -17.4939156918 0.0000000000 -17.4939156918
XXY -11.0969282855 0.0000000000 -11.0969282855
XXZ -6.3380352577 0.0000000000 -6.3380352577
YYX 3.0197725024 0.0000000000 3.0197725024
YYZ 23.8319509495 0.0000000000 23.8319509495
ZZX 6.5147577887 0.0000000000 6.5147577887
ZZY 10.9626842131 0.0000000000 10.9626842131
XYZ 9.8232060722 0.0000000000 9.8232060722
Pd5Co1
Total dipole 0.7427937266 DEBYE(S)
Quadrupole moments in atomic units
Component Electronic+nuclear Point charges Total
--------------------------------------------------------------------------
XX -0.3689202896 0.0000000000 -0.3689202896
YY 0.8420110337 0.0000000000 0.8420110337
ZZ -0.4730907442 0.0000000000 -0.4730907442
XY -0.7046538638 0.0000000000 -0.7046538638
XZ 0.2775166353 0.0000000000 0.2775166353
YZ -0.2651794983 0.0000000000 -0.2651794983
Octupole moments in atomic units
Component Electronic+nuclear Point charges Total
--------------------------------------------------------------------------
XXX 1.7986033244 0.0000000000 1.7986033244
YYY 2.3781401997 0.0000000000 2.3781401997
ZZZ 1.7235775046 0.0000000000 1.7235775046
XXY -1.3028645175 0.0000000000 -1.3028645175
XXZ -0.7319846721 0.0000000000 -0.7319846721
YYX -2.3110430924 0.0000000000 -2.3110430924
YYZ -0.9915928325 0.0000000000 -0.9915928325
ZZX 0.5124397680 0.0000000000 0.5124397680
ZZY -1.0752756822 0.0000000000 -1.0752756822
XYZ 1.2278205220 0.0000000000 1.2278205220
Pd6Co0
Total dipole 0.0015174484 DEBYE(S)
Quadrupole moments in atomic units
Component Electronic+nuclear Point charges Total
--------------------------------------------------------------------------
XX 0.0707788158 0.0000000000 0.0707788158
YY 0.0255709042 0.0000000000 0.0255709042
ZZ -0.0963497200 0.0000000000 -0.0963497200
XY 0.0354461594 0.0000000000 0.0354461594
XZ -0.0587413976 0.0000000000 -0.0587413976
YZ 0.1099160729 0.0000000000 0.1099160729
Octupole moments in atomic units
Component Electronic+nuclear Point charges Total
--------------------------------------------------------------------------
XXX 0.0044357212 0.0000000000 0.0044357212
YYY 0.0004687974 0.0000000000 0.0004687974
ZZZ -0.0037089659 0.0000000000 -0.0037089659
XXY 0.0036357002 0.0000000000 0.0036357002
XXZ -0.0028069683 0.0000000000 -0.0028069683
YYX -0.0020288915 0.0000000000 -0.0020288915
YYZ 0.0065159342 0.0000000000 0.0065159342
ZZX -0.0024068298 0.0000000000 -0.0024068298
ZZY -0.0041044975 0.0000000000 -0.0041044975
XYZ 0.0031050947 0.0000000000 0.0031050947

## Sheet: muliken
Global Optimization of Small Bimetallic Pd-Co Binary Nanoalloy Clusters: A Genetic Algorithm Approach at the DFT Level
Mikail Aslan, Jack B. A Davis and Roy L. Johnston
Mulliken Charqe Analysis of Small Bimetallic Pd-Co Binary Clusters
Pd0Co3		Pd0Co7
Total S,P,D,... shell population		Total S,P,D,... shell population
--------------------------------		--------------------------------
Atom S P D		Atom S P D
--------------------------------------------------------------------------------------		--------------------------------------------------------------------------------------
1 Co 2.93915 6.30299 7.77218		1 Co 2.80026 6.42061 7.65233
2 Co 3.10067 6.22217 7.68020		2 Co 2.81645 6.43658 7.65871
3 Co 3.08082 6.21735 7.68447		3 Co 2.79822 6.42606 7.65201
Free electrons Valency		4 Co 3.18807 6.25434 7.74814
Number of Sum of + Bond indices - Bond indices		5 Co 3.05963 6.28553 7.68528
Valency Free electrons Bond indices =Mulliken charge = Net spin population		6 Co 3.06192 6.28948 7.68641
1 Co 4.56835 13.66029 3.35403 17.01432 1.21432		7 Co 3.08947 6.30832 7.68217
2 Co 4.25776 14.48191 2.52113 17.00304 1.73663		Free electrons Valency
3 Co 4.30101 14.42595 2.55669 16.98264 1.74432		Number of Sum of + Bond indices - Bond indices
		Valency Free electrons Bond indices =Mulliken charge = Net spin population
Pd1Co2		1 Co 4.87972 13.11349 3.75972 16.87321 1.12001
Total S,P,D,... shell population		2 Co 4.77540 13.33342 3.57833 16.91175 1.19707
--------------------------------		3 Co 4.87459 13.12074 3.75555 16.87629 1.11903
Atom S P D		4 Co 4.46454 14.00184 3.18870 17.19055 1.27583
--------------------------------------------------------------------------------------		5 Co 4.88670 13.26296 3.76748 17.03044 1.11922
1 Co 2.93927 6.14566 7.81375		6 Co 4.86061 13.30102 3.73679 17.03781 1.12382
2 Pd 2.72105 6.04672 9.43330		7 Co 4.82806 13.40391 3.67605 17.07996 1.15201
3 Co 2.94084 6.14348 7.81593
Free electrons Valency		Pd1Co6
Number of Sum of + Bond indices - Bond indices		Total S,P,D,... shell population
Valency Free electrons Bond indices =Mulliken charge = Net spin population		--------------------------------
1 Co 3.93017 14.46363 2.43504 16.89868 1.49513		Atom S P D
2 Pd 1.87307 16.37167 1.82939 18.20107 0.04368		--------------------------------------------------------------------------------------
3 Co 3.92320 14.47388 2.42638 16.90026 1.49682		1 Co 2.87673 6.38110 7.60106
		2 Pd 2.83059 6.11809 9.29342
Pd2Co1		3 Co 3.06445 6.33493 7.66077
Total S,P,D,... shell population		4 Co 3.06462 6.33505 7.66074
--------------------------------		5 Co 2.87669 6.38115 7.60114
Atom S P D		6 Co 2.87655 6.38127 7.60120
--------------------------------------------------------------------------------------		7 Co 3.06455 6.33507 7.66081
1 Pd 2.70185 6.08307 9.36617		Free electrons Valency
2 Pd 2.70164 6.08299 9.36629		Number of Sum of + Bond indices - Bond indices
3 Co 2.93928 6.15327 7.60544		Valency Free electrons Bond indices =Mulliken charge = Net spin population
Free electrons Valency		1 Co 4.87779 13.31058 3.54832 16.85890 1.32947
Number of Sum of + Bond indices - Bond indices		2 Pd 2.36790 15.93171 2.31039 18.24210 0.05751
Valency Free electrons Bond indices =Mulliken charge = Net spin population		3 Co 4.91407 13.37530 3.68484 17.06015 1.22922
1 Pd 2.06800 16.15976 1.99132 18.15108 0.07668		4 Co 4.91404 13.37588 3.68454 17.06042 1.22950
2 Pd 2.06742 16.16014 1.99078 18.15092 0.07664		5 Co 4.87824 13.30918 3.54980 16.85898 1.32844
3 Co 4.21337 14.31315 2.38485 16.69800 1.82853		6 Co 4.87880 13.30806 3.55097 16.85903 1.32782
		7 Co 4.91380 13.37621 3.68421 17.06043 1.22958
Pd3Co0
Total S,P,D,... shell population		Pd2Co5
--------------------------------		Total S,P,D,... shell population
Atom S P D		--------------------------------
--------------------------------------------------------------------------------------		Atom S P D
1 Pd 2.69814 6.08541 9.21621		--------------------------------------------------------------------------------------
2 Pd 2.70810 6.08852 9.20397		1 Co 2.87368 6.42229 7.56699
3 Pd 2.69770 6.08525 9.21670		2 Pd 2.82296 6.11999 9.26573
Free electrons Valency		3 Co 2.85680 6.44455 7.57729
Number of Sum of + Bond indices - Bond indices		4 Co 2.87005 6.42338 7.56727
Valency Free electrons Bond indices =Mulliken charge = Net spin population		5 Co 3.04691 6.36614 7.62699
1 Pd 2.36655 15.87012 2.12963 17.99975 0.23692		6 Pd 2.72697 6.19966 9.18034
2 Pd 2.40807 15.84175 2.15884 18.00059 0.24922		7 Co 3.04943 6.36529 7.62729
3 Pd 2.36522 15.87116 2.12850 17.99965 0.23672		Free electrons Valency
		Number of Sum of + Bond indices - Bond indices
Pd0Co4		Valency Free electrons Bond indices =Mulliken charge = Net spin population
Total S,P,D,... shell population		1 Co 5.08504 13.08910 3.77386 16.86296 1.31118
--------------------------------		2 Pd 2.42083 15.86167 2.34701 18.20869 0.07381
Atom S P D		3 Co 5.02090 13.27208 3.60657 16.87865 1.41433
--------------------------------------------------------------------------------------		4 Co 5.08832 13.07868 3.78202 16.86070 1.30630
1 Co 3.08422 6.32857 7.64668		5 Co 5.04735 13.26037 3.77966 17.04003 1.26768
2 Co 2.95763 6.30891 7.67400		6 Pd 2.73962 15.48515 2.62182 18.10697 0.11779
3 Co 2.95763 6.30891 7.67399		7 Co 5.04408 13.26712 3.77489 17.04200 1.26919
4 Co 3.08422 6.32856 7.64668
Free electrons Valency		Pd3Co4
Number of Sum of + Bond indices - Bond indices		Total S,P,D,... shell population
Valency Free electrons Bond indices =Mulliken charge = Net spin population		--------------------------------
1 Co 4.77846 13.76120 3.29826 17.05946 1.48020		Atom S P D
2 Co 4.81988 13.63920 3.30134 16.94054 1.51854		--------------------------------------------------------------------------------------
3 Co 4.81989 13.63918 3.30135 16.94053 1.51854		1 Pd 2.72138 6.16272 9.20330
4 Co 4.77845 13.76121 3.29825 17.05946 1.48020		2 Pd 2.72137 6.16272 9.20330
		3 Pd 2.72383 6.20273 9.20940
Pd1Co3		4 Co 2.78903 6.48810 7.61775
Total S,P,D,... shell population		5 Co 3.02250 6.30549 7.62169
--------------------------------		6 Co 3.02255 6.30546 7.62172
Atom S P D		7 Co 2.78896 6.48828 7.61771
--------------------------------------------------------------------------------------		Free electrons Valency
1 Co 2.73050 6.37069 7.70323		Number of Sum of + Bond indices - Bond indices
2 Pd 2.91917 6.08489 9.26333		Valency Free electrons Bond indices =Mulliken charge = Net spin population
3 Co 3.23450 6.19731 7.69119		1 Pd 2.51519 15.62296 2.46444 18.08739 0.05075
4 Co 2.73060 6.37164 7.70296		2 Pd 2.51515 15.62299 2.46441 18.08739 0.05074
Free electrons Valency		3 Pd 2.60457 15.59330 2.54267 18.13597 0.06190
Number of Sum of + Bond indices - Bond indices		4 Co 4.93430 13.41624 3.47864 16.89488 1.45566
Valency Free electrons Bond indices =Mulliken charge = Net spin population		5 Co 4.60283 13.87456 3.07512 16.94968 1.52771
1 Co 4.58577 13.74944 3.05498 16.80441 1.53080		6 Co 4.60280 13.87457 3.07517 16.94973 1.52764
2 Pd 2.39220 15.92947 2.33792 18.26739 0.05427		7 Co 4.93397 13.41713 3.47781 16.89495 1.45615
3 Co 4.31930 14.30209 2.82091 17.12300 1.49839
4 Co 4.58883 13.74487 3.06033 16.80520 1.52851		Pd4Co3
		Total S,P,D,... shell population
Pd2Co2		--------------------------------
Total S,P,D,... shell population		Atom S P D
--------------------------------		--------------------------------------------------------------------------------------
Atom S P D		1 Co 2.79762 6.48066 7.62484
--------------------------------------------------------------------------------------		2 Pd 2.86326 6.08227 9.27457
1 Co 2.86350 6.22463 7.81111		3 Co 2.80248 6.47988 7.61962
2 Pd 2.64112 6.08834 9.37121		4 Pd 2.62755 6.16859 9.22621
3 Co 2.86350 6.22449 7.81135		5 Co 2.80619 6.47754 7.62818
4 Pd 2.64122 6.08836 9.37116		6 Pd 2.62981 6.17333 9.22365
Free electrons Valency		7 Pd 2.62395 6.16922 9.22057
Number of Sum of + Bond indices - Bond indices		Free electrons Valency
Valency Free electrons Bond indices =Mulliken charge = Net spin population		Number of Sum of + Bond indices - Bond indices
1 Co 4.15224 14.15924 2.73999 16.89923 1.41224		Valency Free electrons Bond indices =Mulliken charge = Net spin population
2 Pd 2.07950 16.04659 2.05409 18.10068 0.02542		1 Co 4.95053 13.37593 3.52719 16.90312 1.42334
3 Co 4.15167 14.15953 2.73982 16.89935 1.41185		2 Pd 2.44218 15.81933 2.40076 18.22009 0.04142
4 Pd 2.07982 16.04633 2.05441 18.10074 0.02541		3 Co 4.94175 13.40598 3.49599 16.90198 1.44576
		4 Pd 2.57342 15.51244 2.50991 18.02235 0.06351
Pd3Co1		5 Co 4.95443 13.38337 3.52855 16.91191 1.42588
Total S,P,D,... shell population		6 Pd 2.58550 15.51504 2.51176 18.02680 0.07373
--------------------------------		7 Pd 2.58456 15.48808 2.52567 18.01375 0.05890
Atom S P D
--------------------------------------------------------------------------------------		Pd5Co2
1 Co 2.86081 6.26320 7.63302		Total S,P,D,... shell population
2 Pd 2.62345 6.10437 9.35622		--------------------------------
3 Pd 2.62442 6.10317 9.34900		Atom S P D
4 Pd 2.62395 6.10454 9.35386		--------------------------------------------------------------------------------------
Free electrons Valency		1 Pd 2.58501 6.14233 9.24812
Number of Sum of + Bond indices - Bond indices		2 Pd 2.58709 6.14381 9.24877
Valency Free electrons Bond indices =Mulliken charge = Net spin population		3 Pd 2.48957 6.31129 9.18085
1 Co 4.40327 14.09948 2.65755 16.75703 1.74572		4 Co 2.82066 6.51667 7.62739
2 Pd 2.12073 16.00608 2.07796 18.08404 0.04277		5 Pd 2.60199 6.15518 9.24397
3 Pd 2.13724 15.98663 2.08995 18.07658 0.04729		6 Co 2.82273 6.51395 7.62743
4 Pd 2.12617 16.00090 2.08145 18.08235 0.04472		7 Pd 2.79381 6.07982 9.25955
		Free electrons Valency
Pd4Co0		Number of Sum of + Bond indices - Bond indices
Total S,P,D,... shell population		Valency Free electrons Bond indices =Mulliken charge = Net spin population
--------------------------------		1 Pd 2.42859 15.58002 2.39544 17.97546 0.03315
Atom S P D		2 Pd 2.43037 15.58248 2.39718 17.97967 0.03319
--------------------------------------------------------------------------------------		3 Pd 2.63194 15.40740 2.57431 17.98171 0.05763
1 Pd 2.61921 6.12179 9.25903		4 Co 4.98285 13.46678 3.49794 16.96472 1.48490
2 Pd 2.61913 6.12175 9.25918		5 Pd 2.43610 15.61181 2.38933 18.00114 0.04677
3 Pd 2.61784 6.12069 9.26140		6 Co 4.97709 13.47300 3.49112 16.96412 1.48597
4 Pd 2.61822 6.12101 9.26075		7 Pd 2.39778 15.80846 2.32471 18.13318 0.07306
Free electrons Valency
Number of Sum of + Bond indices - Bond indices		Pd6Co1
Valency Free electrons Bond indices =Mulliken charge = Net spin population		Total S,P,D,... shell population
1 Pd 2.31129 15.86275 2.13728 18.00003 0.17401		--------------------------------
2 Pd 2.31052 15.86349 2.13656 18.00006 0.17396		Atom S P D
3 Pd 2.30069 15.87305 2.12688 17.99993 0.17382		--------------------------------------------------------------------------------------
4 Pd 2.30348 15.87033 2.12965 17.99999 0.17383		1 Pd 2.56618 6.13236 9.29723
		2 Pd 2.57440 6.14038 9.28885
Pd0Co5		3 Pd 2.57109 6.13697 9.29224
Total S,P,D,... shell population		4 Pd 2.46861 6.19332 9.14460
--------------------------------		5 Pd 2.56645 6.13265 9.29711
Atom S P D		6 Pd 2.57077 6.13666 9.29256
--------------------------------------------------------------------------------------		7 Co 2.98814 6.61762 7.59179
1 Co 2.77096 6.40474 7.76633		Free electrons Valency
2 Co 2.93860 6.34964 7.65326		Number of Sum of + Bond indices - Bond indices
3 Co 3.09025 6.28213 7.71947		Valency Free electrons Bond indices =Mulliken charge = Net spin population
4 Co 3.08726 6.28923 7.71167		1 Pd 2.27028 15.74928 2.24649 17.99577 0.02379
5 Co 2.92091 6.35270 7.66284		2 Pd 2.31045 15.72153 2.28211 18.00364 0.02834
Free electrons Valency		3 Pd 2.29461 15.73202 2.26828 18.00030 0.02633
Number of Sum of + Bond indices - Bond indices		4 Pd 2.61649 15.20844 2.59809 17.80654 0.01839
Valency Free electrons Bond indices =Mulliken charge = Net spin population		5 Pd 2.27131 15.74883 2.24737 17.99621 0.02394
1 Co 4.77631 13.40833 3.53370 16.94203 1.24262		6 Pd 2.29303 15.73313 2.26687 17.99999 0.02616
2 Co 4.74172 13.59918 3.34233 16.94150 1.39940		7 Co 5.31293 13.40525 3.79230 17.19755 1.52063
3 Co 4.60968 13.76166 3.33019 17.09186 1.27949
4 Co 4.67590 13.65474 3.43342 17.08816 1.24248		Pd7Co0
5 Co 4.74042 13.57572 3.36073 16.93645 1.37969		Total S,P,D,... shell population
		--------------------------------
Pd1Co4		Atom S P D
Total S,P,D,... shell population		--------------------------------------------------------------------------------------
--------------------------------		1 Pd 2.57046 6.17987 9.27179
Atom S P D		2 Pd 2.56907 6.17787 9.27719
--------------------------------------------------------------------------------------		3 Pd 2.48195 6.32363 9.13612
1 Pd 2.85351 6.06586 9.27408		4 Pd 2.56981 6.17947 9.27480
2 Co 2.78757 6.34099 7.76324		5 Pd 2.56996 6.17963 9.27212
3 Co 2.78695 6.34266 7.76294		6 Pd 2.48204 6.32865 9.13182
4 Co 2.78735 6.34195 7.76294		7 Pd 2.57015 6.18049 9.27312
5 Co 3.14327 6.26466 7.72203		Free electrons Valency
Free electrons Valency		Number of Sum of + Bond indices - Bond indices
Number of Sum of + Bond indices - Bond indices		Valency Free electrons Bond indices =Mulliken charge = Net spin population
Valency Free electrons Bond indices =Mulliken charge = Net spin population		1 Pd 2.44694 15.65242 2.36969 18.02211 0.07725
1 Pd 2.39062 15.82140 2.37204 18.19345 0.01858		2 Pd 2.45152 15.63201 2.39212 18.02413 0.05940
2 Co 4.49337 13.69434 3.19747 16.89181 1.29590		3 Pd 3.00934 14.99745 2.94425 17.94170 0.06509
3 Co 4.50157 13.68172 3.21082 16.89254 1.29075		4 Pd 2.44641 15.64899 2.37510 18.02409 0.07131
4 Co 4.49767 13.68841 3.20383 16.89225 1.29384		5 Pd 2.43948 15.66388 2.35783 18.02171 0.08165
5 Co 4.66823 13.63095 3.49900 17.12996 1.16923		6 Pd 3.02606 14.98404 2.95846 17.94251 0.06760
		7 Pd 2.46086 15.62837 2.39539 18.02376 0.06547
Pd2Co3
Total S,P,D,... shell population
--------------------------------
Atom S P D
--------------------------------------------------------------------------------------
1 Pd 2.86268 6.10881 9.25695
2 Co 2.77742 6.35437 7.69593
3 Co 2.78653 6.35784 7.69188
4 Co 2.79452 6.37090 7.71469
5 Pd 2.85899 6.10953 9.25895
Free electrons Valency
Number of Sum of + Bond indices - Bond indices
Valency Free electrons Bond indices =Mulliken charge = Net spin population
1 Pd 2.53509 15.72634 2.50210 18.22844 0.03299
2 Co 4.43623 13.96956 2.85816 16.82772 1.57807
3 Co 4.44396 13.97957 2.85668 16.83625 1.58728
4 Co 4.58544 13.75736 3.12275 16.88012 1.46268
5 Pd 2.52965 15.73129 2.49618 18.22747 0.03347
Pd3Co2
Total S,P,D,... shell population
--------------------------------
Atom S P D
--------------------------------------------------------------------------------------
1 Pd 2.74171 6.11357 9.32425
2 Pd 2.55438 6.16953 9.26473
3 Pd 2.74187 6.11362 9.32431
4 Co 2.80446 6.31369 7.70763
5 Co 2.80484 6.31339 7.70801
Free electrons Valency
Number of Sum of + Bond indices - Bond indices
Valency Free electrons Bond indices =Mulliken charge = Net spin population
1 Pd 2.35073 15.89431 2.28522 18.17953 0.06551
2 Pd 2.36095 15.76414 2.22451 17.98865 0.13644
3 Pd 2.35085 15.89463 2.28517 18.17980 0.06568
4 Co 4.40137 14.01146 2.81432 16.82578 1.58704
5 Co 4.40029 14.01298 2.81326 16.82624 1.58703
Pd4Co1
Total S,P,D,... shell population
--------------------------------
Atom S P D
--------------------------------------------------------------------------------------
1 Pd 2.62391 6.11141 9.36430
2 Pd 2.55090 6.12473 9.28396
3 Co 2.87464 6.39730 7.60861
4 Pd 2.55051 6.12385 9.28336
5 Pd 2.62664 6.11299 9.36289
Free electrons Valency
Number of Sum of + Bond indices - Bond indices
Valency Free electrons Bond indices =Mulliken charge = Net spin population
1 Pd 2.11549 16.00991 2.08970 18.09962 0.02579
2 Pd 2.28896 15.69943 2.26016 17.95959 0.02879
3 Co 4.66689 13.96315 2.91740 16.88055 1.74949
4 Pd 2.28881 15.69732 2.26041 17.95772 0.02841
5 Pd 2.12475 16.00393 2.09859 18.10252 0.02616
Pd5Co0
Total S,P,D,... shell population
--------------------------------
Atom S P D
--------------------------------------------------------------------------------------
1 Pd 2.57874 6.19072 9.25590
2 Pd 2.56861 6.15722 9.26217
3 Pd 2.56853 6.15721 9.26234
4 Pd 2.57502 6.15840 9.26581
5 Pd 2.57484 6.15826 9.26623
Free electrons Valency
Number of Sum of + Bond indices - Bond indices
Valency Free electrons Bond indices =Mulliken charge = Net spin population
1 Pd 2.58290 15.54775 2.47762 18.02537 0.10528
2 Pd 2.37349 15.72579 2.26220 17.98799 0.11129
3 Pd 2.37278 15.72646 2.26162 17.98808 0.11116
4 Pd 2.37988 15.72924 2.26999 17.99924 0.10988
5 Pd 2.37818 15.73092 2.26841 17.99932 0.10978
Pd0Co6
Total S,P,D,... shell population
--------------------------------
Atom S P D
--------------------------------------------------------------------------------------
1 Co 3.01481 6.33118 7.65524
2 Co 3.01497 6.33114 7.65527
3 Co 3.01481 6.33119 7.65524
4 Co 3.01497 6.33116 7.65527
5 Co 3.01059 6.33211 7.65465
6 Co 3.01060 6.33215 7.65465
Free electrons Valency
Number of Sum of + Bond indices - Bond indices
Valency Free electrons Bond indices =Mulliken charge = Net spin population
1 Co 5.03588 13.05485 3.94638 17.00122 1.08950
2 Co 5.03587 13.05498 3.94640 17.00138 1.08947
3 Co 5.03593 13.05477 3.94647 17.00125 1.08946
4 Co 5.03593 13.05491 3.94649 17.00140 1.08944
5 Co 5.03573 13.05173 3.94562 16.99735 1.09011
6 Co 5.03587 13.05153 3.94586 16.99740 1.09001
Pd1Co5
Total S,P,D,... shell population
--------------------------------
Atom S P D
--------------------------------------------------------------------------------------
1 Co 2.97690 6.37678 7.61279
2 Co 2.97672 6.37675 7.61277
3 Pd 2.70999 6.21377 9.18144
4 Co 3.01883 6.40566 7.60584
5 Co 2.97613 6.37683 7.61272
6 Co 2.97652 6.37677 7.61279
Free electrons Valency
Number of Sum of + Bond indices - Bond indices
Valency Free electrons Bond indices =Mulliken charge = Net spin population
1 Co 5.07376 13.16703 3.79944 16.96647 1.27431
2 Co 5.07323 13.16744 3.79880 16.96624 1.27443
3 Pd 2.74201 15.49066 2.61454 18.10520 0.12747
4 Co 5.01016 13.45943 3.57090 17.03033 1.43926
5 Co 5.07269 13.16735 3.79834 16.96569 1.27435
6 Co 5.07295 13.16749 3.79858 16.96607 1.27437
Pd2Co4
Total S,P,D,... shell population
--------------------------------
Atom S P D
--------------------------------------------------------------------------------------
1 Pd 2.85300 6.11075 9.24884
2 Pd 2.85130 6.11234 9.25404
3 Co 2.97902 6.36506 7.63835
4 Co 2.98381 6.36847 7.62234
5 Co 2.74786 6.42657 7.63481
6 Co 2.74914 6.42131 7.63298
Free electrons Valency
Number of Sum of + Bond indices - Bond indices
Valency Free electrons Bond indices =Mulliken charge = Net spin population
1 Pd 2.50588 15.77017 2.44243 18.21259 0.06345
2 Pd 2.49543 15.77628 2.44140 18.21768 0.05403
3 Co 4.87588 13.45693 3.52550 16.98243 1.35038
4 Co 4.92150 13.41744 3.55719 16.97463 1.36431
5 Co 4.82693 13.39482 3.41441 16.80924 1.41251
6 Co 4.80641 13.41921 3.38421 16.80343 1.42219
Pd3Co3
Total S,P,D,... shell population
--------------------------------
Atom S P D
--------------------------------------------------------------------------------------
1 Pd 2.64464 6.21057 9.22304
2 Pd 2.77013 6.07487 9.26697
3 Co 2.76963 6.44743 7.64312
4 Co 2.87845 6.31227 7.66078
5 Co 2.80854 6.43010 7.65464
6 Pd 2.82266 6.10444 9.27772
Free electrons Valency
Number of Sum of + Bond indices - Bond indices
Valency Free electrons Bond indices =Mulliken charge = Net spin population
1 Pd 2.58529 15.59495 2.48329 18.07824 0.10200
2 Pd 2.34147 15.81487 2.29710 18.11197 0.04436
3 Co 4.65750 13.72542 3.13476 16.86018 1.52275
4 Co 4.44470 14.01361 2.83790 16.85151 1.60680
5 Co 4.93114 13.33436 3.55892 16.89328 1.37222
6 Pd 2.43648 15.81555 2.38927 18.20482 0.04721
Pd4Co2
Total S,P,D,... shell population
--------------------------------
Atom S P D
--------------------------------------------------------------------------------------
1 Pd 2.58273 6.14550 9.24541
2 Pd 2.73260 6.08769 9.25220
3 Co 2.84896 6.46953 7.63532
4 Pd 2.58268 6.14572 9.24562
5 Co 2.84897 6.46935 7.63530
6 Pd 2.73258 6.08758 9.25226
Free electrons Valency
Number of Sum of + Bond indices - Bond indices
Valency Free electrons Bond indices =Mulliken charge = Net spin population
1 Pd 2.36133 15.70857 2.26507 17.97364 0.09626
2 Pd 2.32423 15.81477 2.25772 18.07249 0.06652
3 Co 4.86311 13.59438 3.35943 16.95381 1.50368
4 Pd 2.36130 15.70888 2.26514 17.97402 0.09616
5 Co 4.86257 13.59494 3.35869 16.95362 1.50388
6 Pd 2.32407 15.81493 2.25748 18.07242 0.06659
Pd5Co1
Total S,P,D,... shell population
--------------------------------
Atom S P D
--------------------------------------------------------------------------------------
1 Pd 2.55462 6.16561 9.29511
2 Pd 2.56542 6.18437 9.28445
3 Co 2.86519 6.46543 7.63703
4 Pd 2.51583 6.10622 9.30727
5 Pd 2.55661 6.16830 9.29094
6 Pd 2.56548 6.18451 9.28760
Free electrons Valency
Number of Sum of + Bond indices - Bond indices
Valency Free electrons Bond indices =Mulliken charge = Net spin population
1 Pd 2.35057 15.69034 2.32502 18.01535 0.02555
2 Pd 2.41809 15.64406 2.39019 18.03425 0.02790
3 Co 4.76243 13.86108 3.10656 16.96764 1.65587
4 Pd 2.25161 15.68224 2.24708 17.92932 0.00453
5 Pd 2.37689 15.66382 2.35204 18.01586 0.02485
6 Pd 2.39986 15.66694 2.37065 18.03758 0.02921
Pd6Co0
Total S,P,D,... shell population
--------------------------------
Atom S P D
--------------------------------------------------------------------------------------
1 Pd 2.52416 6.16058 9.30424
2 Pd 2.55347 6.23229 9.21973
3 Pd 2.55348 6.23224 9.21979
4 Pd 2.55341 6.23208 9.22005
5 Pd 2.55347 6.23229 9.21978
6 Pd 2.52416 6.16057 9.30420
Free electrons Valency
Number of Sum of + Bond indices - Bond indices
Valency Free electrons Bond indices =Mulliken charge = Net spin population
1 Pd 2.34475 15.68681 2.30217 17.98898 0.04258
2 Pd 2.64381 15.46600 2.53949 18.00549 0.10431
3 Pd 2.64352 15.46628 2.53923 18.00551 0.10429
4 Pd 2.64311 15.46627 2.53927 18.00555 0.10383
5 Pd 2.64374 15.46608 2.53945 18.00554 0.10429
6 Pd 2.34479 15.68672 2.30221 17.98893 0.04257
